1 **Fine-tuning spatial-temporal dynamics and surface receptor expression support plasma**  
2 **cell-intrinsic longevity**

3 Zhixin Jing<sup>1</sup>, Phillip Galbo<sup>2,3</sup>, Luis Ovando<sup>1</sup>, Megan Demouth<sup>2</sup>, Skylar Welte<sup>1</sup>, Rosa Park<sup>1</sup>, Kartik  
4 Chandran<sup>3</sup>, Yinghao Wu<sup>3,4</sup>, Thomas MacCarthy<sup>5</sup>, Deyou Zheng<sup>2,4</sup>, David Fooksman<sup>1,2</sup>

5

6 **Affiliations**

7 <sup>1</sup> Department of Pathology, Albert Einstein College of Medicine, Bronx, NY 10461

8 <sup>2</sup> Department of Genetics, Albert Einstein College of Medicine, Bronx, NY 10461

9 <sup>3</sup> Department of Microbiology and Immunology, Albert Einstein College of Medicine, Bronx, NY  
10 10461

11 <sup>4</sup> Department of System and Computational Biology, Albert Einstein College of Medicine, Bronx,  
12 NY 10461

13 <sup>5</sup> Department of Applied Mathematics and Statistics, Stony Brook University, Stony Brook, NY  
14 11794

15

16 **LEAD CONTACT**

17 David Fooksman, [David.fooksman@einsteinmed.edu](mailto:David.fooksman@einsteinmed.edu)

18

19

20

21 **HIGHLIGHTS**

22

- 23 • LLPCs have reduced motility and increased clustering in the BM
- 24 • LLPCs accumulate in the BM PC pool, with mouse age
- 25 • LLPCs have unique surfaceome, transcriptome, and BCR clonality
- 26 • CXCR4 controls maintenance of PCs and antibody titers

27

28

29 **ABSTRACT** (199 words)

30 Durable serological memory following vaccination is critically dependent on the production and  
31 survival of long-lived plasma cells (LLPCs). Yet, the factors that control LLPC specification and  
32 survival remain poorly resolved. Using intra-vital two-photon imaging, we find that in contrast to  
33 most plasma cells in the bone marrow, LLPCs are uniquely sessile and organized into clusters  
34 that are dependent on *Ap1l*, an important survival factor. Using deep, bulk RNA sequencing,  
35 and surface protein flow-based phenotyping, we find that LLPCs express a unique  
36 transcriptome and proteome compared to bulk PCs, fine tuning expression of key cell surface  
37 molecules, CD93, CD81, CXCR4, CD326, CD44 and CD48, important for adhesion and homing,  
38 and phenotypically label LLPCs within mature PC pool. Conditional deletion of *Cxcr4* in PCs  
39 following immunization leads to rapid mobilization from the BM, reduced survival of antigen-  
40 specific PCs, and ultimately accelerated decay of antibody titer. In naïve mice, the endogenous  
41 LLPCs BCR repertoire exhibits reduced diversity, reduced somatic mutations, and increased  
42 public clones and IgM isotypes, particularly in young mice, suggesting LLPC specification is  
43 non-random. As mice age, the BM PC compartment becomes enriched in LLPCs, which may  
44 outcompete and limit entry of new PC into the LLPC niche and pool.

45

## 46 INTRODUCTION

47 Prophylactic antibodies induced by vaccines provide rapid, systemic and in some cases, long-  
48 lasting immune protection against many infectious diseases. Variability in the duration of  
49 antibody responses is chiefly dependent on the composition of short-lived and long-lived plasma  
50 cells produced, which can have distinct lifespans of a few days and months or years in mice,  
51 respectively (Sze et al., 2000). The ability to generate LLPCs also declines with old age, and  
52 hence the durability of the vaccine response (Frasca and Blomberg, 2020) (Palacios-Pedrero et  
53 al., 2021). Therefore, understanding how LLPCs are generated and maintained are essential for  
54 enhancing durability of vaccine-induced antibody responses in humans.

55 Previous studies have reported these LLPCs are enriched in the bone marrow (BM) but can  
56 also be found in spleen and mucosa (Bohannon et al., 2016; Bortnick et al., 2012; Lemke et al.,  
57 2016; Manz et al., 1997; Slifka et al., 1998). Tracking of endogenous polyclonal LLPCs is  
58 challenging, requiring labeling and tracking by thymidine analogs like BrdU, or looking for  
59 antigen-specific antibody forming cells by ELISPOTs. However, these approaches are not  
60 amenable to tracking live cells by flow cytometry, as there have been no phenotypic markers for  
61 endogenous LLPCs, making these cells elusive. Approaches to genetically track LLPCs were  
62 recently established (Xu et al., 2020), which allows studying their turnover and generation.

63 One major question is how these cells are specified. LLPCs can mature from newly-minted  
64 plasmablasts (PBs) in the germinal center that have undergone affinity maturation (Phan et al.,  
65 2006; Takahashi et al., 1998). However, LLPCs can also develop in a T cell-independent  
66 manner (Bortnick and Allman, 2013), and B-1 lineages (Vergani et al., 2022), suggesting that  
67 there are multiple, distinct pathways to becoming LLPCs, or specification is regulated  
68 extrinsically by their niche, or both (Robinson et al., 2020). Thus, it is unclear if LLPCs arise  
69 from unique clones, unique pools of B cells or are just randomly specified from the bulk PC pool,

70 in a stochastic manner, potentially through maturation in the bone marrow niche. Determining  
71 what is required for LLPC specification is important for vaccine development.

72 A second major question regarding LLPCs is how they are maintained and survive in a cell-  
73 specific manner. While functionally they are metabolically active, quiescent, murine LLPCs  
74 (defined as B220- 2NBDG<sup>+</sup>) are thought to have minimal transcriptional specificity compared to  
75 bulk PCs (Lam et al., 2018). In contrast, human LLPCs (CD19<sup>-</sup> CD138<sup>high</sup>) have been shown to  
76 be transcriptionally distinct from other mature PCs (Joyner et al., 2022) .

77 The BM is a major lodging site for LLPCs and it is believed that key cell-extrinsic cellular and  
78 molecular factors support their longevity. PCs migratory behavior and positioning within BM  
79 parenchyma is also linked to chemokine receptor signaling, cell adhesion, cytokine, and age of  
80 mice. Previous work from our laboratory found that as PCs age, CXCR4 expression is increased,  
81 suggesting LLPCs may upregulate certain key molecules for survival. CXCR4 is a master  
82 chemokine receptor for BM tropism but its role in humoral immunity is thought to be dispensable  
83 (Nie et al., 2004). However, CXCR4 drives PC motility in the BM and is upregulated on PC with  
84 aging (Benet et al., 2021). We and others have shown that BM PCs are spatially organized in  
85 clusters (Benet et al., 2021; Mokhtari et al., 2015) and PCs are less motile when they enter  
86 these clusters, suggesting extrinsic signals may be important cues for motility. Moreover, in  
87 mice lacking APRIL, a key survival cytokine for PCs, these clusters were reduced, suggesting  
88 clusters and cell dynamics may be functionally important for PC survival.

89 In this study, we aim to understand what unique features are associated with LLPC physiology,  
90 at a molecular, cellular, and spatial-temporal level using cell fate labeling of PCs. We find that  
91 these cells exhibit intrinsic changes in gene expression and cell motility patterns that may  
92 underlie their unique ability to persist for long periods of time, despite competition from a  
93 continuously evolving PC pool. Among the factors promoting their survival, CXCR4 plays a

94 dominant cell-intrinsic role in promoting LLPCs retention and survival and thus, maintaining  
95 durability of humoral responses.

96

## 97 **EXPERIMENTAL MODEL AND SUBJECT DETAILS**

### 98 **Mice**

99 *Prdm1*-EYFP (Fooksman et al., 2010) were generated previously and can also be obtained from  
100 the Jackson Laboratory. Rosa26-CAG-LSL-tdTomato (Ai14) (Madisen et al., 2010), Rosa26-  
101 LSL-EYFP (Srinivas et al., 2001), and *Cxcr4*<sup>fl/fl</sup> (Nie et al., 2004) were purchased from the  
102 Jackson Laboratory. C57BL/6 (CD45.2) and B6-Ly5.1/Cr (CD45.1) mice were purchased from  
103 Charles River. All mice were housed in groups of 2–5 animals per cage in SPF facilities at  
104 Albert Einstein College of Medicine. The animal protocol in this study was approved by Albert  
105 Einstein College of Medicine Institutional Animal Care Use Committee (IACUC). For PC  
106 turnover experiments, both females and males that are young (6-8 weeks old) or middle-aged  
107 (20-24 weeks old) were used. For mixed bone marrow chimera experiments, 6-8 weeks old sex-  
108 matched mice were used as hosts, and 16-24 weeks old WT or CXCR4<sup>CKO</sup> mice were used as  
109 donors.

110 Blimp1-Cre<sup>ERT2</sup>-IRES-TdTomato (BEC) mouse were constructed using CRISPR-Cas9  
111 technology on the C57BL/6 background by knocking-in Cre<sup>ERT2</sup>-IRES-TdTomato cassette  
112 downstream of the exon 6 of *Prdm1* locus, targeted with one single guide RNA  
113 (TCTGTGGGCAGAAACCCGCG). Founders and F1 progenies were genotyped by PCR using  
114 primers (Integrated DNA Technologies) targeting *Prdm1* genomic region (5'-  
115 GGCAAGATCAAGTATGAGTGC-3', Forward) and IRES sequence (5'-  
116 GCCAAAAGACGGCAATATGG-3', Reverse). This mouse line was backcrossed to C57BL/6 for

117 at least three generations. Since BEC is a knock-in knockout allele, only heterozygotes were  
118 used for all experiments.

### 119 **Generation of mixed bone marrow chimera**

120 6-8 weeks old CD45.1 recipient mice were lethally irradiated (950 RAD) and reconstituted with  
121  $7-8 \times 10^6$  50:50 mixture of WT:CXCR4<sup>ckO</sup> total bone marrow cells, and allowed to recover for 8  
122 weeks with Sulfamethoxazole and Trimethoprim (ANI Pharmaceuticals) added to the drinking  
123 water (1:50 v/v) in the first 2 weeks post reconstitution.

### 124 **Immunizations and treatments**

125 For hapten-protein conjugate immunizations, WT or CXCR4<sup>ckO</sup> mice were immunized  
126 intraperitoneally (i.p.) with 50 µg of NP<sub>(32)</sub>-KLH (Biosearch Technologies) in PBS emulsified with  
127 alum (Imject Alum; Thermo Fisher Scientific) at 2:1 v:v ratio in 150 µl volume. For PC turnover  
128 experiments, 4 mg tamoxifen (MilliporeSigma) were administered by oral gavage per mouse for  
129 three consecutive days. For intratibial injection experiments, 5 µg of 4-Hydroxytamoxifen  
130 (MilliporeSigma) in 10 µl 5% ethanol (diluted with PBS) was given through shaved knee joint  
131 into the tibia using 29G insulin syringes, and 2.5 µg pertussis toxin (MilliporeSigma) in 100 µl  
132 volume PBS were intravenously (i.v.) injected to recipient mice. For glucose uptake experiments,  
133 50 µg 2-NBDG (Thermo Fisher Scientific) in 100 µl volume PBS was i.v. injected into mix  
134 chimeric mice for exactly 15 min before sacrifice.

### 135 **Flow cytometry**

136 Single cell suspensions of bone marrow and spleen were resuspended in PBS containing 0.5%  
137 BSA and 1 mM EDTA and filtered through a 70 µm nylon mesh. Cells were blocked with anti-  
138 CD16/32 (2.4G2, Bio X Cell) and then stained for surface proteins with a combination of  
139 antibodies on ice for 30min, and analyzed on Cytex Aurora (Cytex Biosciences). Single stains  
140 for YFP and TdTomato were prepared using blood cells from Blimp1-YFP mouse and OT-II

141 TdTomato mouse, and all other stains were made by staining wildtype bone marrow cells with  
142 individual fluorescently labeled antibody. Compensations were done by automatic live unmix in  
143 SpectroFlo software (Cytek Biosciences) during acquisition, followed by manual adjustment of  
144 the compensation matrix. To ensure the accuracy of the manual changes in the compensation  
145 matrix, day 5 middle-aged BEC-YFP bone marrow cells were stained with each panel antibody  
146 separately to control for the matrix for each marker accordingly such that each stain consists of  
147 a basic panel including YFP, TdTomato, CD138-APC, B220-APCCy7, live/dead-CD4/8-BV510,  
148 and one of panel markers. Then, for each timepoint (except day 5) analyzed in the PC  
149 timestamping experiments, a day 5 middle-aged BEC-YFP mouse stained with all panel  
150 antibodies were included as a compensation control. The profiling of the total 19 markers were  
151 done by splitting into 3 subpanels with each panel sharing CD138-APC, B220-APCCy7, and  
152 live/dead-CD4/8-BV510. The antibody dilution was determined by titrating absolute amount (in  
153  $\mu\text{g}$ ) per million total bone marrow cells. For intracytoplasmic (4-hydroxy-3-nitrophenyl)acetyl (NP)  
154 staining in PCs, surface-stained cells were fixed and permeabilized using BD Cytotfix/Cytoperm  
155 Fixation/Permeabilization kit (BD Biosciences), followed by NP-BSA-Fluorescein (Biosearch  
156 Tech) staining in 1:200 dilution for 1 hr at 4°C.

157 Anti-B220 (RA3-6B2), Bcl-2 (BCL/10C4), CD4 (GK1.5), CD8 (53-6.7), CD37 (Duno85), CD44  
158 (IM7), CD45.2 (104), CD48 (HM48-1), CD81 (Eat-2), and CD98 (RL388) were purchased from  
159 Biologend. CD28 (37.51), CD53 (OX-79), CD79b (HM79B), CD93 (AA4.1), CD126 (D7715A7),  
160 CD138 (281-2), CD147 (RL73), CD184 (2B11), CD267 (8F10), CD268 (7H22-E16), CD319  
161 (4G2), CD326 (G8.8) were purchased from BD Biosciences. CD3e (145-2C11), CD45.1 (A20)  
162 and CD49d (R1-2) were purchased from Fisher Scientific. CD269 (REA550) was purchased  
163 from Miltenyi Biotec. Mcl-1 (D2W9E) was purchased from Cell Signaling Technology.

## 164 **In-vitro assays**



165 For NP-binding ELISA of mouse serum, high-binding 96 well plates (Corning Costar) were  
166 coated with 2 µg/ml NP-OVA (Biosearch Tech) in 50 µl volume bicarbonate/carbonate binding  
167 buffer (Abcam) overnight at 4°C. Parafilm were used to minimize evaporation of coating buffer  
168 inside the plate. Then coating buffer were removed and the plate was blocked with 200 µl PBS  
169 containing 1% BSA per well for 2 hrs at room temperature (RT). After removing blocking buffer,  
170 serum samples were added in 50 µl volume with starting dilution at 1:4000 (v:v in blocking buffer)  
171 for 4 serial 2-fold dilutions in triplicates, and anti-NP standard antibody (9T13) were added in 50  
172 µl volume with starting concentration at 1 µg/ml for 8 serial 2-fold dilutions in duplicates,  
173 followed by incubation for 2 hrs at RT. The plates were washed 4 times with PBS containing  
174 0.05% Tween (PBST) before adding 50 µl peroxidase goat anti-mouse IgG-HRP (Jackson  
175 ImmunoResearch) at 1:5000 dilution (v:v in blocking buffer) per well for 1 hr at RT. The plates  
176 were again washed 4 times with PBST, followed by adding 50 µl TMB substrate (MilliporeSigma)  
177 for 5-10 mins at RT, which is stopped by adding 25 µl sulfuric acid (Thermo Fisher Scientific).  
178 The plates were read by EMax Plus microplate reader (Molecular Devices) at 450 nm  
179 wavelength using SoftMax Pro 7 software.

## 180 **Multiphoton intravital imaging and analysis**

181 Surgical preparation for BM intra-tibial imaging was done as previously described (Benet et al.,  
182 2021). Mice were anesthetized using isoflurane gas during imaging process for 4-5 hours. Z-  
183 stack images for multiple regions of tibia were collected sequentially and stitched together either  
184 before or after long-term steady state intravital imaging using Olympus software. All imaging  
185 was performed using an Olympus FVE-1200 upright microscope, 25x1.04 NA objective, and  
186 Deepsee MaiTai Ti-Sapphire pulsed laser (Spectra-Physics) tuned to 920 nm. To maintain  
187 mouse body temperature and limit room light exposure, the microscope was fitted with custom-  
188 built incubator chamber and heated 37°C platform. Time lapses were conducted every 3 mins as  
189 100-120 µm deep Z-stacks (5 µm or 3 µm steps) with 1x zoom and with 512 x 512 X-Y

190 resolution. All image analysis was conducted using Imaris software 9.3 (Bitplane) to detect and  
191 track LLPCs (YFP<sup>+</sup>TdTomato<sup>bright</sup>) and bulk PCs (YFP<sup>+</sup>TdTomato<sup>dim</sup>) in young and middle-aged  
192 mice and to correct drift. Ratio channels (green over red, ch2/ch3) were created together with  
193 background subtraction from infrared channel (ch4) to separate LLPCs from bulk PCs.

#### 194 **Nearest neighbor analysis**

195 LLPCs (YFP<sup>+</sup>TdTomato<sup>bright</sup>) and bulk PCs (YFP<sup>+</sup>TdTomato<sup>dim</sup>) in stitched z-stack images were  
196 detected as described above. The 2D position coordinates (X and Y) were generated from  
197 Imaris built-in spot's function. Nearest neighbor analysis program was created in Fortran using  
198 high performance computing. The average distance between individual LLPC spots and 20  
199 nearest total PC spots (combining both LLPCs and bulk PCs), and between individual bulk PC  
200 spots and their 20 nearest total PC spots were calculated by the program. Then both LLPC  
201 spots and bulk PC spots were randomly picked and the sample size for each subset was  
202 determined using 95% confidence level, 5% margin of error, and total number of spots from  
203 each mouse inputted as population size. The random picking process was iterated twice per  
204 subset. The scripts were executed using a Fortran compiler (cygwin). All code of the data  
205 analysis and work flow can be viewed as text document files provided at github link:

206 <https://github.com/davidfooksman/nearest-neighbor/>

207

#### 208 **RNA isolation and quantitative real-time RT-PCR**

209 At least 20000 LLPCs (YFP<sup>+</sup>TdTomato<sup>+</sup>) and 80000 bulk PCs (YFP<sup>+</sup>TdTomato<sup>+</sup>) from bone  
210 marrow or spleen were sorted using Aria III (BD) for total RNA extraction using RNeasy Plus  
211 Mini Kit (Qiagen) according to manufacturer's protocol. 30 µl RNase-free water were loaded to  
212 the spin column membrane twice to reach higher RNA concentration. 4 µl RNA samples were  
213 used for reverse transcription using High-Capacity RNA-to-cDNA Kit (Applied Biosystems)

214 according to manufacturer's protocol. 2  $\mu$ l cDNA from each sample were used for real time PCR  
215 using TaqMan Universal Master Mix II with UNG (Applied Biosystems) according to  
216 manufacturer's protocol. Predesigned TaqMan assays for Actb (Mm02619580\_g1) and Cxcr4  
217 (Mm01996749\_s1) were purchased from Thermo Fisher Scientific.

### 218 **Bulk RNA sequencing cDNA library preparation**

219 Bone marrow and splenic PCs were isolated and enriched using CD138<sup>+</sup> Plasma Cell Isolation  
220 Kit (Miltenyi Biotec), and stained for CD4 (GK1.5) and CD8 (53-6.7) to dump TdTomato<sup>+</sup> T cells  
221 and DAPI for excluding dead cells before sorting on Aria III (BD) or MoFlo XDP (Beckman  
222 Coulter) for RNA extraction. ~1000 CD4<sup>-</sup>CD8<sup>-</sup>DAPI<sup>-</sup>TdTomato<sup>+</sup> cells from each enriched  
223 samples were sorted into a PCR tube (USA Scientific) containing 0.5  $\mu$ l 10x reaction buffer and  
224 half the final volume of nuclease-free water provided in SMART-Seq v4 Ultra Low Input RNA Kit  
225 for Sequencing (Takara Bio), and subsequent processes were following manufacturer's protocol.  
226 All mixing steps were done by pipetting up and down 5-6 times. ERCC RNA Spike-In Control  
227 Mixes (1:5000) (Life Technologies) were added to sorted cells together with lysis buffer.  
228 Purification of amplified cDNA was done using Agencourt AMPure XP Kit (Beckman Coulter) on  
229 a magnetic separation rack for 1.5 ml tubes (New England Biolabs). The concentration of  
230 purified cDNA was determined using Qubit 1X dsDNA HS Assay Kit (Thermo Fisher Scientific)  
231 on a Qubit 2.0 fluorometer (Thermo Fisher Scientific). The quality of purified cDNA was verified  
232 on a 2100 Bioanalyzer (Agilent Technologies), and the average cDNA fragment size for a typical  
233 PC sample was peaked at approximately 600 bp following a normal distribution pattern. Finally,  
234 sequencing adaptors were added to using Nextera XT DNA Library Preparation Kit (Illumina)  
235 following manufacturer's protocol. The library containing all samples was manually mixed to  
236 ensure equal final concentration of all samples, and sent for next generation deep sequencing  
237 by Genewiz/Azenta using NovaSeq S4 lane machine (Illumina) to reach an average of 50  
238 million reads per sample.

## 239 **RNA-seq data processing and analysis**

240 RNA-seq reads were aligned to the mouse genome (mm39/GRCm39) using STAR aligner  
241 (v2.6.1b) (Dobin et al., 2013). Counts for individual genes were quantified using the RSEM  
242 program (v1.3.1) (Li and Dewey, 2011). Differential expression was computed using the  
243 DESeq2 (v 1.26.0), from pair-wise comparisons at adjusted p value < 0.05 (without additional  
244 fold change threshold) were collected, clustered by K-mean clustering (k=5), and used for Gene  
245 Ontology (GO) enrichment analysis with the patherdb.org server. Enriched GO at adjusted p <  
246 0.05 were obtained and then differentially expressed genes in biologically relevant GO terms for  
247 each of the six comparisons were subject to over representation analysis by the Fisher's test,  
248 with the results shown as bubble plots. Raw data and processed files were uploaded to the  
249 NCBI server (GSE221251).

## 250 **Transmission electron microscopy**

251 PCs are isolated and enriched the same way as mentioned in the "Bulk RNA sequencing cDNA  
252 library preparation" section. 4000-8000 LLPCs (YFP<sup>+</sup>TdTomato<sup>+</sup>) and 40,000-200,000 bulk PCs  
253 (YFP<sup>-</sup>TdTomato<sup>+</sup>) were subsequently collected by sorting into a 500 µl low adhesion  
254 microcentrifuge tubes (USA Scientific) using Aria III (BD) or MoFlo XDP (Beckman Coulter), and  
255 5-6 million sheep red blood cells (Innovative Research) were added to the same tube to provide  
256 contrast to the PCs, as previously described (Joyner CJ et al., 2021 Life Science Alliance),  
257 which were pelleted by centrifugation at 350g for 5 mins at RT. The supernatant was removed  
258 by aspiration, and the fixative containing 2.5% glutaraldehyde in 0.1M cacodylate (prewarmed at  
259 RT) was gently added by layering on top of the residual volume of buffer including the cell  
260 pellets for 15 mins at RT. Samples were postfixated with 1% osmium tetroxide followed by 2%  
261 uranyl acetate, dehydrated through a graded series of ethanol and embedded in LX112 resin  
262 (LADD Research Industries, Burlington VT). Ultrathin sections were cut on a Leica Ultracut UC7,

263 stained with uranyl acetate followed by lead citrate and viewed on a JEOL 1400 Plus transmission  
264 electron microscope at 120kv.

## 265 **BCR repertoire analysis**

266 BCR clones were inferred from RNA-Seq data, individually for each sample, using MIXCR  
267 v4.0.0b (Bolotin et al., 2015) using the following commands:

```
268         mixcr align -s mmu -p kAligner2  
269         mixcr assemble --write-alignments  
270         mixcr assembleContigs  
271         mixcr exportClones -c IG -p fullImputed
```

272 The resulting clone files were pre-processed using a custom python script to separate IGH, IGK  
273 and IGL clones and to remove small clones of size <10. The resulting datasets were processed  
274 using the R package immunarch (<https://immunarch.com/>). Each repertoire (IGH, IGK, IGL) was  
275 loaded using repLoad. Diversity (Chao1) statistics were calculated using repDiversity and  
276 repertoire overlaps using repOverlap, For SHM estimates, we used custom R scripts. We  
277 filtered out fragmented (lists of sequences with commas), then processed the resulting  
278 sequences through IMGT-High V-Quest, which identifies mutations with respect to the closest  
279 germline sequence (from IMGT file "8\_V-REGION-nt-mutation-statistics.txt"). To avoid double-  
280 counting of mutations within a clone, we selected a random sequence from each clone (most  
281 clones only had one sequence), then calculated the mean mutation frequency per sequence  
282 (number of mutations/V gene length), and then aggregated these to calculate a mean for each  
283 IGHV gene allele within each sample (e.g. the mean for all clones assigned to the IGHV8-9\*01  
284 allele). Pairwise statistical comparisons between the samples were performed using a paired t-  
285 test based on matching alleles (alleles that did not match were not used). Benjamini-Hochberg  
286 corrected P values were calculated using the R function p.adjust with the argument  
287 method="BH".

## 288 **Quantification and statistical analyses**

289 Statistical tests were performed using GraphPad Prism (v7 and v8). Specific tests used in each  
290 figure are provided in the figure legends with asterisks for statistical significance (\*, p-value  $\leq$   
291 0.05; \*\*, p-value  $\leq$  0.01; \*\*\*, p-value  $\leq$  0.001; \*\*\*\*, p-value  $\leq$  0.0001) or “ns” denoting  
292 comparisons that are not statistically significant. Data are presented as the mean  $\pm$  SD or mean  
293  $\pm$  SEM. For PC half-life ( $t_{1/2}$ ) calculation, the procedure was done exactly as previously  
294 described (Xu et al., 2020). For RT-qPCR analysis,  $2^{-\Delta\Delta Ct}$  method was used to calculate the fold  
295 change in *Cxcr4* gene expression relative to the expression of housekeeping gene *Actb* in WT  
296 samples.

297

298

## 299 RESULTS

### 300 Plasma cell turnover rate decreases with mouse age

301 We previously reported that in middle-aged mice, PC motility and clustering within the BM and  
302 their recirculation capacity was increased, in comparison to young mice (Benet et al., 2021). We  
303 speculated that these changes in PC dynamics could alter homeostatic PC turnover rates and  
304 may also reflect changes in frequency of LLPCs within PC pool with aging. To study LLPC  
305 survival mechanisms, we constructed a novel mouse line, Blimp1-ERT2-Cre-TdTomato (BEC),  
306 which contains a tamoxifen-inducible cre recombinase (ERT2-cre) and fluorescent reporter  
307 TdTomato under the control of the *Prdm1* (BLIMP1) locus (Supplemental Figure 1A). We  
308 verified that >99% of CD138<sup>high</sup>B220- BM PCs were TdTomato<sup>+</sup> (Supplemental Figure 1B) and  
309 that 94% of TdTomato<sup>+</sup> were ASCs (CD138<sup>high</sup>) (Figure 1A, Supplemental Figure 1C). Tomato  
310 expression was about 1.5-2 log higher than Blimp-1 negative cells, similar to expression by  
311 other reporters in the *Prdm1* endogenous locus (Kallies et al., 2004; Liu et al., 2022; Robinson  
312 et al., 2022). To label and track lifespans of polyclonal PCs under steady-state conditions, we  
313 crossed allele BEC with Rosa26-LSL-EYFP conditional reporter (Srinivas et al., 2001) to  
314 generate BEC-YFP mouse. Acute treatment with tamoxifen for three consecutive days induced  
315 robust Cre-mediated recombination and irreversible expression of YFP, comprised of 98% PCs  
316 at day 5 (Figure 1A) but not in the absence of tamoxifen treatment (Figure 1B). Over time, YFP<sup>+</sup>  
317 PCs that survive for months should by definition be bona fide LLPCs. However, in these mice,  
318 not all LLPCs would be YFP<sup>+</sup>, as new LLPCs should develop in the unlabeled (YFP<sup>-</sup>) fraction.

319 To study aged-related changes in PC turnover, naïve young (6-8 weeks old) and middle-aged  
320 (20-24 weeks old) BEC-YFP mice were acutely treated with tamoxifen and tracked over 150  
321 days after treatment (Figure 1C). At day 5 post treatment, both age groups had similar  
322 frequency of YFP<sup>+</sup> PCs in the BM (~65%) and in the spleen (~62%) (Figure 1D). However, over  
323 time, the remaining frequency of YFP<sup>+</sup> cells of total PCs in young mice were significantly lower

324 than in middle-aged mice in both BM and spleen, indicating more PC turnover in the young mice.  
325 At day 150, only 1.8% BM PCs were YFP<sup>+</sup> in young mice compared to 14% in middle-aged mice,  
326 while in spleen, 0.6% YFP<sup>+</sup> PCs remained in young mice compared to 3.1% in middle-aged  
327 mice (Figure 1E-F). Based on absolute numbers of YFP<sup>+</sup> PCs, we analyzed rate of PC decay in  
328 the BM and spleen and found that BM PCs decay more rapidly in young mice ( $t_{1/2} = 58$  days)  
329 than in middle-aged mice ( $t_{1/2} = 93$  days) (Figure 1G). In the spleen decline of labeled PCs was  
330 overall faster than in the BM, in line with previous reports (Xu et al., 2020). However, we  
331 observed that the decline was slightly more rapid in young mice ( $t_{1/2} = 28$  days) as compared to  
332 middle-aged mice ( $t_{1/2} = 39$  days) (Figure 1H). Thus, we conclude that homeostatic PC turnover  
333 is dependent on tissue-specific microenvironment and aging, suggesting that LLPCs may  
334 accumulate with aging, particularly in the bone marrow.

335

### 336 BM LLPCs display cell-intrinsic arrest and clustering

337 Reduced PC turnover with age, specifically in the BM niche, suggested that PCs were more  
338 sessile and better retained in the BM with aging. However, our previous study that showed  
339 middle-aged mice had increased overall PC motility and recirculation compared to young mice  
340 (Benet et al., 2021). We hypothesized that in our previous study, imaging and recirculation  
341 measurements did not discriminate between behaviors of LLPCs and immature PCs, which may  
342 have different dynamics.

343 To test this idea, we applied BEC fate labeling to specifically track polyclonal LLPC dynamics  
344 and organization in the bone marrow of unimmunized mice. While YFP expression from  
345 Rosa26 reporter was bright enough to visualize labeled LLPCs, YFP<sup>-</sup> bulk PCs, which also  
346 expressed low levels of Tomato from expression of the BEC allele (Tomato<sup>dim</sup>), were  
347 insufficiently labeled for deep imaging in the BM. Thus, we bred double PC reporter, Blimp1-



348 YFP BEC *rosa26*<sup>LSL-Tomato</sup> mice, in which all PCs were YFP<sup>high</sup> from expression of the Blimp1-  
349 YFP reporter, and with tamoxifen treatment, could be fate-labeled to co-express high levels of  
350 Tomato. We treated these mice with tamoxifen and analyzed surface phenotype of PCs at day  
351 5 and 60 post treatment (Figure 2A). Tomato<sup>bright</sup> labeled PCs were easily discernable from  
352 Tomato<sup>dim</sup> bulk PCs by flow cytometry (Figure 2B). While at day 5 post treatment, Tomato<sup>bright</sup>  
353 and Tomato<sup>dim</sup> PCs were similar in PC maturation markers CXCR4 and CD93, by day 60,  
354 Tomato<sup>bright</sup> were phenotypically distinct suggesting they had matured to a LLPC state (explored  
355 further in the next section). Using intra-vital time-lapse imaging, we compared Tomato<sup>bright</sup> and  
356 Tomato<sup>dim</sup> BM PCs dynamics in young and middle-aged mice at day 5, day 30 and day 60 post  
357 tamoxifen in order to determine the contribution of intrinsic PC age/maturity to their motility and  
358 positioning. We could discriminate and track both PC populations on the basis of Tomato  
359 expression in the same time-lapse movies (Figure 2C, Supplemental Video S1). At day 5 after  
360 treatment, dynamics of both subsets of PCs were similar, based on spider plots, track and  
361 displacement velocities, and mean-squared displacement plots (Figure 2D). However, at day  
362 30 and 60 timepoints, Tomato<sup>bright</sup> PCs showed reduced motility as compared to Tomato<sup>dim</sup> PCs  
363 indicating PC age correlated with reduced cell motility. This effect with PC aging was seen in  
364 both young and middle-aged mice, suggesting it was cell intrinsic, and thus related to LLPC  
365 maturation. While average speeds for Tomato<sup>bright</sup> PCs were relatively slow, some rare PCs  
366 were highly motile. At day 30 and 60 timepoints, these fast cells were predominantly in  
367 Tomato<sup>dim</sup> populations (Figure 2E), consistent with immature, short-lived PCs having faster  
368 motility than LLPCs.

369 Next we analyzed LLPC spatial organization, as we and others have shown the bulk BM PCs  
370 are organized in clusters (Benet et al., 2021; Mokhtari et al., 2015) and that clusters were sites  
371 of reduced PC motility (Benet et al., 2021). We used two approaches to determine if LLPCs  
372 were more clustered than total Bulk PCs. First, we applied our custom script (Benet et al., 2021)

373 to identify high density PC clusters. We masked these regions and found that at late timepoints  
374 after tamoxifen, Tomato<sup>bright</sup> LLPCs were more enriched in clusters than bulk PCs (Figure 2F-G).  
375 As this approach can be sensitive to PC densities, we developed a second approach to  
376 determine if subsets of PCs were enriched in clusters, based on measuring the nearest distance  
377 to twenty PC neighbors (Figure 2H). Using this measurement, we found that at day 60,  
378 Tomato<sup>bright</sup> LLPCs were closer to neighboring PCs (i.e., more clustered) than Tomato<sup>dim</sup> bulk  
379 PCs, in the BM of both young and middle-aged mice (Figure 2I). Taken together, while overall  
380 PC motility increases with mouse age, most of the increases in motility can be accounted for by  
381 bulk PCs and not by LLPCs, which were relatively sessile. This decrease in LLPC motility is  
382 also accompanied by an aggregation or retention in PC clusters, suggesting these are LLPC  
383 niches, and may be important for their cell-intrinsic survival or retention in the bone marrow.

384

#### 385 Differentially expressed surface receptors accompany LLPC maturation

386 Based on cell intrinsic changes in LLPC motility, we hypothesized that LLPCs may upregulate  
387 (or downregulate) unique cell surface receptors as compared to bulk PCs, important for their  
388 intrinsic long-term survival and retention in the bone marrow and/or spleen. There are currently  
389 no effective surface markers for identifying murine LLPCs and identifying these factors could  
390 provide utility for studying LLPCs generation and decay under various vaccination conditions.

391 Based on existing RNA-seq or microarray datasets (Akhmetzyanova et al., 2021; Cornelis et al.,  
392 2020; Lam et al., 2018; Shi et al., 2015), we curated a list of 19 PC markers, which we reasoned  
393 might be differentially expressed by LLPCs, based on the high abundance of their gene  
394 transcripts in total PCs (Supplemental Figure 2A). To assay their expression, we measured and  
395 normalized marker expression (fold-change) on YFP<sup>+</sup> LLPCs over YFP<sup>-</sup> bulk PCs, in the bone  
396 marrow and spleen of both young and middle-age BEC-YFP mice at day 5, 30, 90 or 150 post

397 tamoxifen treatment. At day 5, we expected no difference in YFP<sup>+</sup> and YFP<sup>-</sup> PCs, an important  
398 staining and compensation control for all our replicates.

399 Overall summary of surface marker expression fold changes for YFP<sup>+</sup> PCs are shown in [Figure](#)  
400 [3A](#). As expected, at the early timepoint (D5), there were no differences in the gMFI of all  
401 markers between the two populations regardless of the tissue type and age of the mice.  
402 However, from day 30 to day 150, 6 out of 19 markers were upregulated (CD93, CD81, CXCR4,  
403 and CD326) or downregulated (CD44 and CD48) with PC age ([Figure 3B](#)). For the most part,  
404 these changes were subtle, whereas CD93 and CD81 expression showed the largest difference  
405 in surface expression with PC age ([Figure 3C-D](#)). CD93 expression was uniquely bimodal  
406 among all tested markers, with YFP<sup>+</sup> LLPCs in BM and spleen were predominantly found in  
407 CD93<sup>+</sup> subset, in line with genetic evidence for its importance in LLPC maintenance (Chevrier et  
408 al., 2009). The cell-intrinsic progressive upregulation of surface CXCR4 level in LLPCs  
409 corroborated our previous findings using an adoptive transfer approach (Benet et al., 2021).  
410 Other well-known PC factors important for survival were not differentially expressed by LLPCs,  
411 such as Syndecan-1 (CD138) ([Figure 3E](#)), BCMA (CD269), and TACI (CD267) involved in in  
412 APRIL signaling (McCarron et al., 2017) nor CD28 also implicated in PC survival (Utley et al.,  
413 2020) ([Figure 3A](#)). Some of these LLPC markers (CD44, CD81, CD326 and CD93) showed a  
414 larger fold change in young mice as compared to middle-aged mice, in contrast to CXCR4 and  
415 CD48 which were not sensitive to mouse age. Splenic LLPCs had higher CD93, CD326 and  
416 CXCR4 fold increase over bulk YFP<sup>-</sup> splenic PCs, when compared to BM LLPCs fold changes,  
417 which may reflect immaturity of YFP<sup>-</sup> PCs in the spleen.

418 Previous characterization of murine LLPCs used glucose uptake, using fluorescent analog,  
419 2NBDG, as a marker for LLPCs (Lam et al., 2018). Indeed, YFP<sup>+</sup> LLPCs had a high (~80%)  
420 frequency of 2NBDG in the BM and spleen at day 90 and day 150 post tamoxifen  
421 ([Supplemental Figure 2B-C](#)). However, while 2NBDG status was different between LLPCs and

422 bulk PCs in the spleen, there was no differential expression between bulk PCs and LLPCs in  
423 BM, indicating that 2NBDG status may not discriminate between LLPCs and short-lived PCs in  
424 the bone marrow.

425 Previous transmission electron microscopy (TEM) studies have shown changes in morphology  
426 during PC maturation (Fooksman et al., 2010; Joyner et al., 2022). We also sorted YFP<sup>+</sup> LLPCs  
427 and YFP<sup>-</sup> bulk PCs from the spleen and BM at day 90 and conducted TEM to see if  
428 morphological differences accompanied LLPC maturation ([Supplemental Figure 3](#)). Overall, we  
429 did not detect statistically significant differences in cell size, cytoplasmic area, mitochondrial  
430 density between mature PC subsets, although the distributions had wide ranges. There were  
431 minor yet significant changes in nuclear size and chromatin density in splenic LLPCs over BM  
432 LLPCs. Taken together, we conclude that differential surface protein expression accompanies  
433 cell-intrinsic LLPC maturation, but otherwise cells appear morphologically similar.

#### 434 LLPCs accumulate in BM with mouse aging

435 Using the six differentially expressed surface receptors ([Figure 3B](#)), we wondered if this panel of  
436 surface markers could be used to reliably identify live murine quasi-LLPCs in WT mice (that  
437 lacked BEC-YFP reporter). We validated that the panel was capable of enriching for YFP<sup>+</sup>  
438 LLPCs by using the BEC-YFP mice at day 90 post tamoxifen. Ideally, we wanted the minimal  
439 panel necessary, thus we analyzed the contribution of different marker(s) alone or combined  
440 towards the enrichment of LLPCs, while avoiding any substantial loss of YFP<sup>+</sup> cells.  
441 ([Supplemental Figure 4](#)). We found that overall, adding more markers increased LLPC  
442 enrichment up to 6-fold, in a step-wise, additive manner ([Figure 4A and 4B](#)).

443 While the labeled PCs in BEC-YFP at day 90 or later timepoints are bona-fide LLPCs, they do  
444 not represent all of the LLPCs in the tissue, as new LLPCs were generated after time-stamping.  
445 Based on changes in PC turnover, PC motility, and surface expression, we hypothesized that

446 the frequency of LLPCs in the total PC pool of the BM may be increasing with mouse age. Thus,  
447 we used our panel to assess the frequency of total LLPCs in WT young and middle-aged mice.  
448 Middle-aged mice had a higher frequency of LLPCs in the bone marrow as compared to young  
449 mice (Figure 4C), consistent with the decrease in PC turnover (Figure 1G-H). Thus, as mice  
450 age, not only do they accumulate more BM PCs (Pioli et al., 2019), but these cells are also  
451 more long-lived and mature.

452 CXCR4 controls durability of humoral responses by promoting PC survival and retention in the  
453 BM.

454 CXCR4 is the master chemokine receptor required for lymphocyte entry and retention in the  
455 bone marrow (Zehentmeier and Pereira, 2019). Based on its important role in BM PC motility  
456 and retention (Benet et al., 2021), and its upregulated expression on LLPCs (Figure 3B), we  
457 decided to test if it is required in PCs specifically to maintain humoral responses. Previous work  
458 (Nie et al., 2004) had shown that conditional deletion of *Cxcr4* using a pan B cell expressing cre  
459 (CD19-cre) was dispensable for humoral responses and PC survival following vaccination, but  
460 potentially this approach did not specifically target PCs and may not be fully penetrant (Aaron  
461 and Fooksman, 2022).

462 To delete *Cxcr4* expression in PCs, we bred BEC *rosa26<sup>LSLYFP</sup> Cxcr4<sup>fl/fl</sup>* mice (or CXCR4<sup>ckO</sup>).  
463 Cohorts of control BEC-YFP (here referred to as WT) and CXCR4<sup>ckO</sup> mice were immunized (on  
464 day -30) with NP-KLH/Alum to generate similar NP-specific PCs and titers at day -3 (Figure 5A-  
465 B, Supplemental Figure 5A-B), at which point, they received tamoxifen to induce *Cxcr4* deletion  
466 in CXCR4<sup>ckO</sup> mice and fate-label PCs with YFP in both groups of mice. We confirmed that *Cxcr4*  
467 expression was diminished specifically in YFP<sup>+</sup> PCs in CXCR4<sup>ckO</sup> mice at mRNA transcript and  
468 protein levels (Figure 5C, Supplemental Figure 5C) at day 60 in the BM and splenic LLPCs but  
469 not in control bulk PCs. Interestingly, CXCR4 surface protein levels were significantly reduced  
470 but not completely lost, suggesting incomplete deletion in some cells. Nevertheless, anti-NP

471 titers declined faster in CXCR4<sup>ckO</sup> mice as compared to WT controls (Figure 5B). Decreases in  
472 anti-NP titers were associated with reduced numbers of NP-specific LLPCs (YFP<sup>+</sup>) in spleen  
473 and bone marrow of CXCR4<sup>ckO</sup> mice as compared to WT mice (Figure 5D).

474 To determine the role of CXCR4 in homeostatic PC turnover and LLPC competition, we  
475 generated chimeric animals using 1:1 ratio of congenically-labeled cells from WT and CXCR4<sup>ckO</sup>  
476 mice. For these studies, mice expressing BEC *rosa26*<sup>L-SL-Tomato</sup> alleles were used as WT controls.  
477 Eight weeks post reconstitution (Figure 5E), mice were treated with tamoxifen and PC decays  
478 were tracked over 90 days by flow cytometry. At day 5, fewer PCs were found in the CXCR4<sup>ckO</sup>  
479 vs WT compartment in the bone marrow and spleen (Figure 5F, Supplemental Figure 5D),  
480 suggesting labeling efficiency was reduced or there was rapid decline in KO PCs cells from the  
481 tissue. Correcting for their relative abundance at day 5, labeled WT (Tomato<sup>bright</sup>) PCs in BM  
482 hardly decayed over 90 days, whereas ~50% of CXCR4<sup>ckO</sup> were lost (Figure 5G, Supplemental  
483 Figure 5E). Within the spleen, PC turnover was overall more rapid, with a 50% and 90% loss of  
484 WT and CXCR4<sup>ckO</sup> labeled PCs, respectively. Overall, WT PCs outcompeted CXCR4<sup>ckO</sup> PCs in  
485 the BM and spleen over time as assessed by competency ratio (Figure 5H, supplemental Figure  
486 5F). We analyzed changes in key PC pro-survival factors, Mcl1 and Bcl2 (Figure 5I-J), and  
487 found that WT labeled PCs had higher relative expression than CXCR4<sup>ckO</sup> counterparts, and  
488 while they had similar levels at day 5, PC survival was compromised by loss of CXCR4 over  
489 time in bone and spleen suggesting CXCR4 is important for long term survival of PCs.

490 CXCR4 signaling can directly promote cell survival via AKT pathway (Scotton et al., 2002), but it  
491 may act indirectly on PC survival by dislodging from survival niches. Thus, we asked if loss of  
492 antigen-specific CXCR4<sup>ckO</sup> PCs was due to cell death in the bone marrow, or egress from the  
493 bone marrow niche, eventually leading to PC loss. Chimeric mice were intra-tibially (IT) injected  
494 with 4-hydroxy-tamoxifen (4OH-TAM), to induce cre recombination in PC subsets in one bone  
495 (Figure 5K). We used this approach previously to track recirculation of BM PCs (Benet et al.,

496 2021). At day 1 post injection, WT PCs within the injected tibia were the predominant location  
497 of labeled PCs, consistent with a local administration and activity (Figure 5L, Supplemental  
498 Figure 5G). However, within CXCR4<sup>ckO</sup> PC pool, most of the labeled PCs were predominantly  
499 found in the spleen, but also found at higher frequencies in other bones. This subset-specific  
500 effect is unlikely due to leakage of 4OH-TAM to other tissues, as it would have affected both  
501 groups of PCs equally. Thus, the likely conclusion is that CXCR4<sup>ckO</sup> must have rapidly  
502 egressed the BM upon cre-deletion of *Cxcr4*. Over time labeled WT PCs egressed the tibia and  
503 redistributed to other sites whereas the labeled CXCR4<sup>ckO</sup> PC remained fixed in spleen and  
504 other niches (Figure 5M). To confirm this effect was due to rapid egress, mice were pretreated  
505 with pertussis toxin (PTX), which we had found could block PC motility in the BM (Benet et al.,  
506 2021). Pretreatment with PTX prevented CXCR4<sup>ckO</sup> PCs from accumulating in the spleen,  
507 following IT-administration of 4-OH-TAM (Supplemental Figure 5H). Thus, deletion of *Cxcr4*  
508 triggers rapid mobilization of PCs from the BM, suggesting dislodging PCs from their niche  
509 occurs prior to defects in cell survival.

#### 510 Shared transcriptional program accompanies BM and splenic LLPC specification

511 As ASCs mature and migrate to the bone marrow, their transcriptome changes (Shi et al., 2015).  
512 Based on the changes in surface expression, we hypothesized that LLPCs may also encode a  
513 unique transcriptome that fuel these protein expression differences. Based on previous studies  
514 of PC transcriptome studies (Lam et al., 2018), we expected mRNA expression differences in  
515 LLPCs to be minor, and due to the over-representation of immunoglobulins in the transcriptome,  
516 we performed bulk RNA sequencing with deep reads (50 million reads per sample) to improve  
517 our resolution of global changes. For these studies, we FACS-purified matching populations of  
518 YFP<sup>+</sup> LLPCs and YFP<sup>-</sup> bulk PCs from bone marrow and spleen of BEC-YFP mice, on day 90  
519 post tamoxifen treatment. We used groups from both young and middle-aged mice for these  
520 studies to see what effect mouse age played in gene expression or PC composition. As

521 negative controls, we also sorted YFP<sup>+</sup> and YFP<sup>-</sup> PCs from middle-aged mice, on day 5 post  
522 treatment. In all, we analyzed 12 groups of PCs (n=3/4 per group, 44 samples total). For these  
523 global analyses, we excluded immunoglobulin genes, but analyzed them separately in the next  
524 section.

525 We performed unsupervised clustering of day 90 PC samples using all differentially expressed  
526 genes (DEGs) measured by pair-wise comparisons of YFP<sup>+</sup> and YFP<sup>-</sup> samples, from matching  
527 tissues ( $p_{\text{adj}} < 0.05$ , with no cut-offs for fold-change or reads). Based on the sample dendrogram,  
528 we found that most LLPC (yellow) and bulk PC (red) samples clustered separately, and within  
529 the LLPCs, BM (light green) and splenic (dark green) samples were closely-related (column  
530 headings on [Figure 6A](#)). Unsupervised clustering of DEGs (rows) revealed five groups of genes  
531 ([Figure 6A, Supplemental Table 1](#)). Specifically, groups 5 and 2 genes contained DEGs that  
532 were either upregulated or downregulated in all LLPC groups, respectively. Group 1 genes were  
533 specifically upregulated in splenic LLPCs, suggesting tissue-specific expression patterns. To  
534 better understand the overlaps or similarities of these LLPC groups, we generated an UpSet  
535 analysis plot (Conway et al., 2017; Lex et al., 2014), based on pair-wise comparisons ([Figure](#)  
536 [6B](#)). Splenic LLPCs from young and middle-aged mice had the most DEGs, likely because  
537 splenic (YFP<sup>-</sup>) bulk PCs used in comparisons were highly enriched in short-lived PCs. Among  
538 DEGs shared among LLPC subsets, many were shared by 3 or 4 of groups. 12 DEGs were  
539 shared by all LLPCs (*Cd55*, *Cxcr3*, *Cyp4f18*, *Fam3c*, *Gpx3*, *H2-Aa*, *H2-Ab1*, *Hcst*, *Prss57*,  
540 *Rab3b*, *Slamf6*, *Spag5*). As negative controls, comparisons of day 5 YFP<sup>+</sup> vs YFP<sup>-</sup> PCs were  
541 conducted, and as expected, very few DEGs were detected or shared with LLPCs. Using circle  
542 plots ([Figure 6C](#)), we summarized the overlaps of DEGs, and found that BM LLPCs DEGs were  
543 more commonly shared among LLPC groups, as compared to splenic LLPCs. We also  
544 observed that LLPCs from middle-aged mice had fewer DEGs than young mice, consistent with  
545 the view that bulk PCs (YFP<sup>-</sup>) are enriched with LLPCs in older mice ([Figure 4C](#)).



546 Next, to determine which biological pathways were altered in LLPCs, we generated GO-terms  
547 based on the previously identified DEGs, and assessed term-enrichment in LLPC subsets and  
548 day 5 control groups (Figure 6D). As expected, LLPCs showed downregulation of MHC Class  
549 II pathway and proliferation related pathways. In contrast, LLPCs showed increased in cell  
550 survival and stress response pathways, increased lipid metabolism, and neural-immune  
551 signaling. Changes in cell adhesion and chemotaxis were highly enriched in LLPCs and there  
552 were also changes in cytokine production pathways. From the total DEG list, putative cell  
553 surface receptors were extracted to generate heatmaps of normalized expression among PC  
554 subsets in the BM and spleen, clustered by DEG groups (Figure 6E). These included  
555 chemokine receptors (*Ccr10*, *Cxcr3*, *Ccr9*, *S1pr1*, *Ebi3*), adhesion molecules (L-selectin, *Ly6*  
556 family, Galectins, *Cd93*), MHC-related molecules, co-stimulatory factors (SLAM family, *Tigit*),  
557 and cytokine receptors (*Il6st*, *Il13ra1*, *Ifnar2*, *Tgfb2*) to name a few. Some of these LLPC  
558 factors were tissue-specific, such as *C1q* and *Adgre5* expressed by splenic LLPCs. There were  
559 notable absences from the list, such as *Cxcr4*, which is upregulated at the protein level in  
560 LLPCs, suggesting that minor changes in transcripts may be regulating larger changes at the  
561 protein level, or important regulation may be occurring post-transcriptionally (Greenbaum et al.,  
562 2003).

563 We also generated a putative list of transcription factors (TF) and chromatin-remodeling factors  
564 differentially expressed in LLPCs (Figure 6F). Among known PC-related factors, *Bmi1* (Di  
565 Pietro et al., 2022) was upregulated in LLPCs while *Myb* (Good-Jacobson et al., 2015), *Klf2*  
566 (*Winkelmann et al., 2011*) and *Zbtb32* (Jash et al., 2019) were down-regulated. Interestingly,  
567 *Aire* (Mathis and Benoist, 2009) was among the most upregulated LLPC genes, but its role in  
568 PCs has not been explored. Many classical PC TFs were not differentially expressed by LLPCs,  
569 including *Prdm1* (encoding Blimp1), *Irf4*, and *Xbp1*. Taken together, murine LLPCs exhibit a

570 unique global transcriptome, fine-tuning surface receptors and transcriptional factor expression,  
571 which may support longevity.

572 LLPC receptors have reduced BCR diversity but enriched in public clones.

573 As expected, the major RNA transcript in these PCs were immunoglobulin heavy and light  
574 chains. We assembled over 26,000 complete clones (but not paired sequences) for the BCR  
575 heavy and light loci and analyzed their clonal properties, to determine if LLPCs had unique  
576 features in different tissues and are from mice of different ages. Notably, these are unselected  
577 polyclonal PCs from naïve mice, with unknown antigen specificities.

578 First, we analyzed isotype usage and found that IgA PCs were the major isotype within the BM  
579 and also in the spleen, to a lesser extent ([Figure 7A](#)). The one notable exception was that  
580 splenic LLPCs from young mice that were time-stamped at 6-8 weeks of age were highly  
581 enriched in IgM, in comparison to all other samples, including splenic bulk PCs from same  
582 (young) mice. This suggest that these splenic IgM LLPCs are specified early in life and tend to  
583 be selectively retained, and maybe derived from B-1 lineages (Baumgarth, 2016). Within LLPCs  
584 subsets, both in young and middle-aged mice, BM LLPCs have a higher IgA:IgM composition as  
585 compared to splenic LLPC counterparts, suggesting tissue-specific homing or retention of  
586 different LLPCs on the basis of isotype.

587 Next, we analyzed diversity of clones in the LLPC and bulk PC subsets, by comparing the heavy  
588 chain V-segment + CDR3 exact amino acid sequences. We found that LLPC samples (day 90  
589 YFP<sup>+</sup> BM and spleen) had reduced clonal diversity based on Chao1 estimation index ([Figure 7B](#))  
590 as compared to bulk (day 90 YFP<sup>-</sup> BM and spleen) PCs, while no differences were observed  
591 between YFP<sup>+</sup> and YFP<sup>-</sup> subsets at day 5 post TAM. This suggested LLPCs had a reduced  
592 repertoire and complexity compared to bulk PCs. This also raised the possibility that different  
593 subsets of clones were selected for LLPC fate specification.

594 Based on the isotype differences and reduced diversity in LLPCs compared to bulk PCs, we  
595 calculated frequencies of shared clones from different PC groups within the same mouse  
596 (Figure 7C), in order to see if LLPC and bulk PCs arise from same pool of B cells. We also  
597 analyzed if PCs from BM and spleen had shared clones, to see if related clones can home to  
598 either sites migrate to both sites or possibly recirculate (Benet et al., 2021). As controls, PCs  
599 from day 5-treated mice showed the highest overlap of clones between YFP<sup>+</sup> and YFP<sup>-</sup> subsets  
600 in all tissues, along with bulk (YFP<sup>-</sup>) PCs in BM and spleen, consistent with their heterogenous  
601 PC phenotypes and coordinated timing for PC differentiation. LLPCs in the BM and spleen  
602 shared more clones in common amongst themselves than with bulk PCs in the same tissue or  
603 other sites. This is consistent with either a PC repertoire changing over time with mouse age or  
604 unique selection of certain clones into LLPC fate base on specificity. This trend was more  
605 striking in young mice, which have fewer LLPCs in the YFP<sup>-</sup> subset than in middle-aged mice,  
606 suggesting these LLPCs may arise from a different population of B cells in young mice.

607 LLPCs have been suggested to arise from germinal centers, which could suggest that residency  
608 time in the GC may regulate selection into the LLPC pool. To see if polyclonal LLPCs were  
609 more highly mutated than total bulk PCs, we compared overall somatic hypermutation (SHM)  
610 frequencies in V regions matching samples of YFP<sup>+</sup> (LLPC) and YFP<sup>-</sup> (bulk PCs) and found that  
611 day 90 LLPC clones had fewer mutations than bulk PCs in BM or spleen whereas no  
612 differences in mutations were observed between day 5 samples (Figure 7D). When averaging  
613 all clones per sample, LLPCs also had fewer SHM than paired bulk PC samples in the same  
614 tissue of the same mouse. (Figure 7E). LLPCs timestamped at 6-8 weeks (young mice) had  
615 even fewer mutations than LLPCs in middle-aged mice. Overall, this confirms that PC cells  
616 need not arise from affinity-selected GC B cells in order to enter the LLPC pool.

617 Finally, to see if certain clones were “public” (or shared by at least 2 samples from different  
618 mice), we analyzed heavy chain clonal overlap (as in Figure 7B-C) in all samples. Young mice

619 had the highest overlap of shared public clones compared to other groups (Figure 7F). We  
620 analyzed which groups of PCs were responsible for this elevation and found that LLPCs in BM  
621 and spleen accounted for most of the public clones (Supplemental Figure 6A). Next, we  
622 analyzed the top 100 most abundant public clones across all samples (Supplemental Figure 6B)  
623 and found a biased enrichment towards LLPC samples (Figure 7G). While LLPCs represented  
624 about 28% of all found clones (n= 26144), in the top public clones across samples, 75% were  
625 found in LLPC samples from multiple tissues and mice (Figure 7H). Among the top LLPC public  
626 clones (found in >75% of LLPC samples, Supplemental Figure 6B), they were surprisingly  
627 absent in bulk PC groups (Figure 7I). This suggests that the some of LLPC endogenous  
628 repertoire is directly selected into the LLPC compartment for long term maintenance.

629

630

## 631 **DISCUSSION**

632 The mechanisms and conditions underlying cell fate into long-lived plasma cells following  
633 vaccination remains a long-standing question for durable humoral memory. Moreover, once  
634 LLPCs are specified, the intrinsic programming and extrinsic factors that control their longevity  
635 are still undefined (Robinson et al., 2022; Robinson et al., 2020). While the field has leaned  
636 towards a model that LLPCs arise from late GC B cells (Weisel et al., 2016), LLPCs can be  
637 generated by T-independent fashion (Bortnick et al., 2012) as well. Recent work using similar  
638 PC time-stamping tools have demonstrated that NP-specific LLPCs can arise from pre-GC  
639 stages and accumulate at constant click during the immune response, showing no bias towards  
640 late stages (Robinson et al., 2022) nor requiring high affinity for longevity, at least in the NP-  
641 immunization model. In “naïve” mice, which are not biased by immunization, we find clones  
642 selected into LLPCs pool bear fewer somatic mutations than bulk PCs, consistent with recent

643 scRNA-seq analysis (Liu et al., 2022), and aforementioned findings that LLPC generation is not  
644 strictly dependent on late GC B cells following immunization (Robinson et al., 2022) (Koike et al.,  
645 2023). We also find limited diversity in BCR repertoire, which may reflect unique clones or  
646 antigens are pre-programmed for LLPC or, merely that longer immune responses engender  
647 more clonal LLPC over time (Robinson et al., 2022). We also find LLPCs are enriched in public  
648 or shared clones, which have been recently shown to be microbial and self-reactive (Blanc et al.,  
649 2016; Lino et al., 2018; Liu et al., 2022; Racine et al., 2011). Interestingly, while some of our  
650 public clone lists have shared V-regions with known self-reactive and microbial specificities,  
651 many are not found on any of these lists, suggesting variations in microbiome composition or  
652 diet may shift the LLPC clonal composition.

653 We also find differences in the isotype compositions of endogenous LLPCs in naïve mice based  
654 on tissue and mouse age. Within the BM, we found that IgA<sup>+</sup> LLPCs are the major subset,  
655 similar to the bulk BM PC composition, in line with previous studies (Liu et al., 2022; Xu et al.,  
656 2020), and likely depend on microbial composition in the gut (Liu et al., 2022; Wilmore et al.,  
657 2018). In contrast, the majority of splenic LLPCs are a mix of IgM<sup>+</sup> and IgA<sup>+</sup> LLPCs, and  
658 particularly in young mice, IgM<sup>+</sup> LLPCs seem to be preferentially generated and retained in the  
659 splenic niche. While IgM<sup>+</sup> LLPCs can be generated by various pathways, including infection or  
660 immunizations (Blanc et al., 2016; Racine et al., 2011), and even persist in germ-free mice (Lino  
661 et al., 2018), this early wave of IgM<sup>+</sup> LLPCs is consistent with B-1-derived precursors that  
662 maintain natural antibodies in the spleen and peritoneal cavity (Baumgarth, 2011, 2016). Indeed,  
663 we find that LLPCs timestamped early (in young mice) had more public clones, less diversity  
664 and limited SHM, which may further indicate these cells are derived from B-1 lineage (Vergani  
665 et al., 2022). Recent time-stamping work has pointed out that IgM isotypes have longer half-  
666 lives than IgG PCs and IgA (Koike et al., 2023) (Liu et al., 2022), suggesting unique  
667 transcriptional programs that may preferentially retain these IgM LLPCs in PC niches through

668 altered adhesion receptor expression (Higgins et al., 2022; Liu et al., 2022), at the cost of newly  
669 minted PCs, presumably from B-2-derived responses. LLPC clones are shared across the BM  
670 and splenic compartment, suggesting these niches can be redundant and may accommodate  
671 LLPC recirculation between sites (Benet et al., 2021).

672 We find unique transcriptome and proteome expressed by endogenous LLPCs that underlie  
673 their intrinsic longevity. On the RNA level, these changes are minor, as others have noted (Lam  
674 et al., 2018), and often below detection limits for standard fold-change cut-offs or heterogeneity  
675 in the LLPC pool (Liu et al., 2022). However, these small changes can reflect larger changes in  
676 protein levels, particularly within cells that are optimized for massive protein production,  
677 suggesting that proteomics may be a more appropriate way to study changes in PC to LLPC  
678 maturation changes. Among the GO-terms and DEGs found, most are shared by LLPCs in the  
679 BM or spleen suggesting similar requirements for survival or that these cells are recirculating  
680 between niches over time, consistent with clonal overlap between both sites (Figure 7C), and in  
681 line with what we have reported for bulk PCs (Benet et al., 2021). However, we find that cluster  
682 1 of DEGs among splenic LLPCs, associated with IgM-specific factors such as complement  
683 receptors, in line with recent study (Higgins et al., 2022) indicating that IgM<sup>+</sup> LLPCs have unique  
684 expression and potentially functional roles in the spleen (Bohannon et al., 2016). In contrast,  
685 we did not find major changes in metabolism based on GO-terms, glucose uptake,  
686 mitochondrial density, suggesting PC function and longevity are not directly linked. Many of the  
687 LLPC DEGs were surface proteins, suggesting cell dynamics, and cell communication changes  
688 are critical for LLPC function and longevity.

689 A major goal of our study was to address what changes LLPCs have adapted to maintain their  
690 survival while most PCs are short-lived. Mechanistically, are their lifetime intrinsically-regulated  
691 by an internal clock (Robinson et al., 2022) as with GC B cells (Mayer et al., 2017), or by  
692 competition with other PCs for a limited niche? Our imaging data supports the later model as

693 part of that process. We find that LLPCs are preferentially arrested and clustered in the bone  
694 marrow in a cell intrinsic manner. This paucity in LLPC movement stands in contrast to the  
695 intermittent burst speeds of the neighboring bulk PCs, enriched in short-lived PCs, highlighting  
696 that change in motility is a cell-intrinsic program rather than merely stochastic or spatially  
697 controlled by certain extrinsic cues, as suggested in T cells (Fowell and Kim, 2021). Indeed,  
698 both LLPCs and bulk PCs can be observed residing in one cluster, suggesting all PCs can  
699 share and potentially compete for the same cell-extrinsic cues, however the proportion and  
700 lifetime of LLPCs within these complexes is higher and longer, suggesting residency is  
701 important. We do observe LLPCs displaced from these structures suggesting that competition  
702 may be dynamic process. Indeed, transfer of PCs into B cell-deficient mice have longer  
703 lifetimes than seen in immunocompetent mice, suggesting PC survival is competitive (Bohannon  
704 et al., 2016). Moreover, rapid depletion of BM PCs using CD138-DTR mouse leads to rapid  
705 recovery of BM PCs at a similar density as before (Koike et al., 2023), suggesting a limited  
706 niche size (Sze et al., 2000).

707 What factors underlie LLPC clustering? We previously showed that hematopoietic-derived  
708 APRIL promotes BM PC clustering and motility, suggesting it may be enriched in clusters (Benet  
709 et al., 2021). However, receptors for APRIL, TACI and BCMA, and co-receptor CD138, were  
710 not differentially expressed on LLPCs, suggesting enhanced ligand-receptor binding is unlikely  
711 to play an important role in LLPC retention in the niches, or directly leading to enhanced LLPC  
712 survival. Potentially, the upregulation of adhesion molecule such CD93 (Chevrier et al., 2009)  
713 and CD326 (EpCAM) (Gires et al., 2020) may help LLPCs dock the niches for a prolonged  
714 period of time and hence longer survival, along with the other changes we detected in our  
715 surface expression profiling, including multiple changes in SLAM and *Ly6* family protein  
716 expression. Thus, their longevity fate may be shaped by multiple cell-intrinsic homing and  
717 retention factors that promote preferential docking at these sites. These cell-intrinsic changes in

718 motility and positioning that accompany LLPC specification are likely critical to their long-term  
719 maintenance over newly minted PCs.

720 Among these differentially expressed homing factors, we have been particularly focused on  
721 CXCR4's functional role in BM PC motility and LLPC survival. We have found that LLPCs  
722 upregulate CXCR4 over other PCs, and PC-intrinsic deletion of CXCR4 led to rapid egress from  
723 the BM, leading to reduced overall PC survival, disrupting NP-specific antibody titers. Our  
724 model directly targets CXCR4 during the PC stage, in an inducible fashion, in contrast with a  
725 previous study (Nie et al., 2004) that used a constitutive deletion of CXCR4 in B cell lineage and  
726 found no effect on humoral immunity. CXCR4 plays multiple roles through B cell differentiation,  
727 including during the germinal center (Allen et al., 2004), thus early deletion of CXCR4 may  
728 result in compensatory mechanisms in their model. While it is tempting to simply conclude that  
729 increased CXCR4 expression by LLPCs directly leads to cell-intrinsic arrest in BM niches, we  
730 have also showed that CXCR4 promotes BM PC motility, and inhibitors quickly perturb PC  
731 motility (Benet et al., 2021). One possibility could be dynamics in chemokine receptor  
732 expression or ligand availability may be at play. While CXCL12 is ubiquitously expressed within  
733 the BM (Benet et al., 2021), lower levels of CXCL12 in some regions of parenchyma or reduced  
734 CXCR4 expression may foster cell movement or chemokinesis, whereas higher CXCR4 levels  
735 on LLPCs may promote cell-intrinsic arrest in CXCL12-rich niches (Lammermann and  
736 Kastenmuller, 2019). Moreover, gain-of-function alleles of CXCR4 also lead to shortened  
737 humoral responses, while increasing the number of total PCs (Biajoux et al., 2016), which  
738 further suggests that a dynamic range in CXCR4 signaling within PC pool is important for  
739 regulating LLPC survival, in a competitive manner (Aaron and Fooksman, 2022). Thus, CXCR4  
740 may coordinate with other spatial positioning factors to give LLPCs optimal positioning in limited  
741 niches (Hauser et al., 2002; Lammermann and Kastenmuller, 2019).



742 As mice age, PCs accumulate in the bone marrow (Pioli et al., 2019) and other sites (Nunez et  
743 al., 2016; Schaum et al., 2020), but we now report that this increase is accompanied by an  
744 enrichment in LLPCs within the PC pool based on surface marker expression and by reduced  
745 turnover of BM PCs in middle-aged mice. Increases in LLPCs presumably raises the threshold  
746 needed for newly generated PCs to be retained and survive in the BM. By intravital imaging, we  
747 see that overall PC speeds increase in older mice (Benet et al., 2021), which is likely due to  
748 faster motility by short-lived PCs, as LLPCs remain largely sessile. These faster and longer  
749 movements may reflect that short-lived PCs are unable to find open survival niches. This  
750 indicates that PC niches in the BM are limited, and may be sites of competition between newly-  
751 minted PCs and LLPCs. Indeed, as mice age, increases in pre-existing LLPCs may further limit  
752 the survival capacity of newly-minted PC leading to weakened and shortened serological  
753 responses. Thus, in improving weak and short-lived humoral responses in older adults (Fedele  
754 et al., 2022; Wagner and Weinberger, 2020)., we may need to consider the role of LLPCs  
755 competition in regulating these processes.

756

## 757 **ACKNOWLEDGMENTS**

758 We would like to thank Dr. Yongwei Zhang, Einstein Transgenic facility, for helping construct  
759 BEC mice, Dr. Xusheng Zheng for help with generating surface marker heat map, Einstein Flow  
760 cytometry core for FACS sorting, Einstein Genomics Core for bioanalysis, Einstein Analytical  
761 Imaging Facility for help with EM imaging and analysis. This work was supported by  
762 R01HL141491 (DRF), Irma T. Hirschl/Monique Weill-Caulier Trusts Research Award (DRF),  
763 R01AI132633 (KC) with support from the Albert Einstein NCI Cancer Center grant  
764 P30CA013330., SIG #1S10OD016214-01A1. We thank Leslie Cummins for help analyzing and  
765 preparing EM images. We thank Dr. Gregoire Lauvau for comments on the manuscript.

766 **AUTHOR CONTRIBUTIONS**

767 The study was conceived, designed, by D.R.F. and Z.J, who also wrote the manuscript. Z.J.  
768 conducted experiments for all figures. L.O. contributed to Figure 4. R.P. contributed work that  
769 supported conclusions in Figure 2. S.W. analyzed EM data in Supplemental Figure 3. K.C. and  
770 M.D. generated unique reagents. P.G., D.Z. analyzed global RNAseq transcriptome Figure 6,  
771 and T.M. helped with BCR clonal analysis for Figure 7. Y.H. developed nearest-neighbor  
772 analysis for Figure 2.

773



775 **FIGURE LEGENDS**

776 Figure 1. Plasma cell turnover rate decreases with mouse age.

777 (A), PC purity of TdTomato<sup>+</sup>YFP<sup>-</sup> and TdTomato<sup>+</sup>YFP<sup>+</sup> cells in BEC-YFP mouse at day 5 post  
778 tamoxifen treatment. (B), Percentage of YFP<sup>+</sup> PCs in BEC-YFP mouse in the absence of  
779 tamoxifen treatment or treated for 3 consecutive days and analyzed 5 days after the last  
780 treatment. (C), Experimental setup for measuring homeostatic PC turnover rate in young and  
781 middle-aged mice by timestamping at day 5, 30, 90, and 150 after oral gavage tamoxifen  
782 treatment, accompanied by transcriptional profiling using bulk RNA-seq at day 5 and 90 and  
783 morphological characterization using transmission electron microscopy at day 90. (D), FACS  
784 pseudo color plots showing decay kinetics of percentage of TdTomato<sup>+</sup>YFP<sup>+</sup> in total B220<sup>-</sup>  
785 TdTomato<sup>+</sup> PCs remaining in the BM (upper panel) and spleen (lower panel) in young and  
786 middle-aged mice, quantified in (E) for BM and (F) for spleen. (G) and (H), Absolute numbers  
787 (left panel) and half-lives ( $t_{1/2}$ ) (right panel) of TdTomato<sup>+</sup>YFP<sup>+</sup> PCs in the BM (H) and spleen (I)  
788 in young and middle-aged mice. Curve fitting and  $t_{1/2}$  calculations were conducted by using  
789 absolute numbers fitted in a one-phase decay model. All bars show mean (E-H) or mean  $\pm$  SD  
790 (D and I). \*, P < 0.05; \*\*, P < 0.01; \*\*\*\*, P < 0.0001; ns, non-significant by unpaired Student's t test.  
791 All graphs show pooled data from at least two independent experiments. ( E, n = 6-18; F, n = 7-  
792 13; G, n = 6-21; H, n = 7-13)

793 Figure 2. BM LLPCs display cell-intrinsic arrest and clustering.

794 (A), Experimental setup for intratibial two-photon intravital imaging of both TdTomato<sup>dim</sup>YFP<sup>+</sup>  
795 bulk PCs and TdTomato<sup>bright</sup>YFP<sup>+</sup> LLPCs in the same young or middle-aged mouse by  
796 timestamping at day 5, 30, and 60 after oral gavage tamoxifen treatment. (B), FACS gating  
797 strategy (left panel) for TdTomato<sup>dim</sup>YFP<sup>+</sup> bulk PCs and TdTomato<sup>bright</sup>YFP<sup>+</sup> LLPCs after intravital  
798 imaging and surface CXCR4 and CD93 expression (right panel) on TdTomato<sup>dim</sup>YFP<sup>+</sup> bulk PCs

799 compared to TdTomato<sup>bright</sup>YFP<sup>+</sup> LLPCs at day 5 (control timepoint) and day 60 post tamoxifen  
800 treatment. (C), Time-lapse images highlighting the cell migration trajectories of 4 bulk PCs  
801 (green spot with light purple tracks) and 2 LLPCs (yellow spots with red tracks) in a small region  
802 of BM parenchyma. Scale bars, 7  $\mu\text{m}$ . (D), Individual cell tracks of total bulk PCs or LLPCs  
803 plotted at a common origin (left panel) in young and middle-aged mice at day 5, 30, and 60 post  
804 tamoxifen treatment. Comparison of total bulk PCs and LLPCs track velocity (middle left panel),  
805 track displacement velocity (middle right panel), and mean-squared displacement (right panel)  
806 in young and middle-aged mice at day 5, 30, and 60 post tamoxifen treatment. (E), Fractions of  
807 fast-moving cells (track velocity  $> 1 \mu\text{m}/\text{min}$ ) in bulk PCs compared to LLPCs at day 30 and 60  
808 post tamoxifen treatment. Data were pooled from young and middle-aged mice for each  
809 timepoint. (F) Representative intravital 3D flattened image of masked intensity channels of bulk  
810 PCs (green) and LLPCs (yellow) (upper panel) and PC spots (bulk PCs in green and LLPCs in  
811 yellow) and cluster surfaces (purple) (lower panel) identified for analysis in (G). (G), Average  
812 percentage of bulk PCs compared to LLPCs staying inside cluster surface over time (left panel).  
813 Average time of individual bulk PCs spent inside cluster surface compared to that of LLPCs  
814 (right panel). (H) Depiction of nearest neighbor analysis for cell-cell distance (lines) in 3D  
815 (collapsed in 2D) between bulk PCs (green) and total PCs (green and orange), or between  
816 LLPCs (orange) and total PCs (green and orange), which is quantified in (I) for an average  
817 distance between bulk PCs or LLPCs and their 20 nearest neighbor cells (total PCs combining  
818 bulk PCs and LLPCs). Each symbol represents one randomly picked cell per subset, and data  
819 were pooled from at least two mice. All bars show mean (F, G, H, and I) or mean  $\pm$  SEM (D and  
820 G). \*,  $P < 0.05$ ; \*\*,  $P < 0.01$ ; \*\*\*\*,  $P < 0.0001$ ; exact p-values; ns, non-significant by Mann Whitney  
821 U test (D), Kruskal-Wallis test with Dunn's test for multiple comparisons (I), or paired Student's t  
822 test (E and G). All graphs show pooled data from at least two independent experiments. (E, n =  
823 3-5; I, n = 4)

824 Figure 3. Differentially expressed surface receptors accompany LLPC maturation.

825 (A), Heatmap depicting average fold changes of surface marker expression level (gMFI) on  
826 TdTomato<sup>+</sup>YFP<sup>+</sup> LLPCs and TdTomato<sup>+</sup>YFP<sup>-</sup> bulk PCs from 3-4 mice per unit at indicated  
827 timepoints post tamoxifen treatment in the bone marrow and spleen of young and middle-aged  
828 mice. Color scale showing fold increase in red, fold decrease in blue, or no difference in white.  
829 (B), Overlay histograms comparing the expression level of differentially expressed surface  
830 markers on TdTomato<sup>+</sup>YFP<sup>-</sup> bulk PCs to TdTomato<sup>+</sup>YFP<sup>+</sup> LLPCs at day 90 post tamoxifen  
831 treatment. (C-E), The fold change of the expression level (gMFI) of differentially expressed  
832 surface markers (CD93 (C), CD81 (D), CD138 (E)) on TdTomato<sup>+</sup>YFP<sup>+</sup> LLPCs relative to  
833 TdTomato<sup>+</sup>YFP<sup>-</sup> bulk PCs in individual mouse at indicated timepoints post tamoxifen treatment  
834 in the bone marrow (upper panel) and spleen (lower panel) of young and middle-aged mice. All  
835 bars show mean  $\pm$  SEM (C-E). \*, P < 0.05; \*\*, P < 0.01; \*\*\*, P < 0.001; \*\*\*\*, P < 0.0001; ns, non-  
836 significant by unpaired Student's t test. All graphs show pooled data from at least two  
837 independent experiments. (A,C-E, n = 3-7)

838 Figure 4. LLPCs accumulate in the BM with mouse aging.

839 (A), Percentage of TdTomato<sup>+</sup>YFP<sup>+</sup> LLPCs after enrichment using a combination of 1-6 antibody  
840 panel of differentially expressed surface markers identified in Figure 3. 0 marker represents the  
841 percentage of TdTomato<sup>+</sup>YFP<sup>+</sup> LLPCs at day 90 post tamoxifen in young mice. (B),  
842 Representative FACS contour plots showing the fractions of YFP<sup>+</sup> LLPCs in total TdTomato<sup>+</sup>  
843 PCs after enrichment using a combination of 1-6 antibody panel of differentially expressed  
844 surface markers. (C), Percentage of quasi-LLPCs in total PCs identified using 6-marker  
845 antibody panel in young and middle-aged mice at steady state. All bars show mean (C). \*\*, P <  
846 0.01, by unpaired Student's t test. All graphs show representative data of at least two  
847 independent experiments. (C, n = 5-6 mice)

848 Figure 5. CXCR4 controls durable humoral response by promoting PC survival and retention in  
849 the BM.

850 (A), Experimental set up for examining the role of CXCR4 in sustaining antigen-specific antibody  
851 responses using a NP-KLH/Alum immunization model. i.p., intraperitoneal. (B), Anti-NP antibody  
852 titer in WT or CXCR4<sup>ckO</sup> mice before tamoxifen treatment at day 30 post immunization (left  
853 panel) and the remaining percentage of pre-treat anti-NP antibody at indicated timepoints post  
854 tamoxifen treatment (right panel). (C), Fold change of FACS-purified YFP<sup>+</sup> PCs *Cxcr4* mRNA  
855 level in WT or CXCR4<sup>ckO</sup> mice, normalized to *Actb* levels in WT mice. (D), Absolute numbers of  
856 NP-specific bulk PCs and LLPCs in the bone marrow (left panel) and spleen (right panel) of WT  
857 and CXCR4<sup>ckO</sup> mice. (E), Experimental set up for generating mixed bone marrow chimera  
858 reconstituted with WT and CXCR4<sup>ckO</sup> donors. (F), Absolute number of (YFP<sup>+</sup>) labeled BM and  
859 spleen PCs at indicated timepoints post tamoxifen treatment (G) normalized labeled PC  
860 numbers shown in (F) (relative to day 5 post tamoxifen treatment). (H) PC competitive  
861 competency (right panel) at indicated timepoints determined by normalizing the CXCR4<sup>ckO</sup>:WT  
862 ratio in the bone marrow labeled PC compartment to that of total splenic B cell compartment  
863 (upper panels) or the CXCR4<sup>ckO</sup>:WT ratio in the splenic labeled PC compartment to that of total  
864 splenic B cell compartment (lower panels). (I and J), Mcl1 (I) and Bcl2 (J) intracytoplasmic  
865 expression (by gMFI) of WT or CXCR4<sup>ckO</sup> labeled PC compartment at indicated timepoints in  
866 the bone marrow (left panel) and spleen (right panel). Fold changes of WT over CXCR4<sup>ckO</sup>  
867 labeled PCs in Mcl1 and Bcl2 expression level are indicated above the statistical significance  
868 symbol. (K), Experimental set up for intratibial injection into WT: CXCR4<sup>ckO</sup> mixed bone marrow  
869 chimera in the presence or absence of pertussis toxin treatment. (L), Absolute number of  
870 labeled WT or CXCR4<sup>ckO</sup> PC in injected tibia and distal organs/tissues at day 1 post 4-OH-TAM  
871 injection. (M), Distribution of absolute numbers of labeled WT or CXCR4<sup>ckO</sup> PCs in injected tibia  
872 and distal organs/tissues. All bars show mean ± SEM. Each symbol in all plots represents one

873 mouse. \*,  $P < 0.05$ ; \*\*,  $P < 0.01$ ; \*\*\*,  $P < 0.001$ ; \*\*\*\*,  $P < 0.0001$ ; ns, non-significant by unpaired  
874 Student's t test (B, C, D, F-G, L, and M), paired Student's t test (I and J) or one-way ANOVA  
875 with multiple comparison correction using the Holm-Šídák test (H). All graphs show pooled data  
876 from two independent experiments. (B,  $n = 13-15$  (left),  $n = 6-9$  (right); C,  $n = 4-8$ ; D,  $n = 6-9$ ; F-  
877 H,  $n = 8-10$ ; I,  $n = 8-10$ ; J,  $n = 8-10$ ; L-M,  $n = 4$ )

878

879 Figure 6. Shared transcriptional program accompanies BM and splenic LLPC specification

880 (A), Heatmap depicting unsupervised clustering of total differentially expressed genes (DEGs,  
881  $p_{\text{adj}}\text{-value} < 0.05$ ) between TdTomato<sup>+</sup>YFP<sup>-</sup> bulk PCs to TdTomato<sup>+</sup>YFP<sup>+</sup> LLPCs across tissue  
882 types (bone marrow and spleen) and mouse ages (young and middle-aged) at day 90 post  
883 tamoxifen treatment, with no cutoff for fold change and transcripts per million reads (TPM).  
884 Color scale represents z-score for normalization per gene (row). Total DEGs were separated in  
885 5 color-coded clusters. (B), UpSet plot visualizing total number of DEGs in each pair-wise  
886 comparison (single node) and intersections (connecting nodes) between DEGs among different  
887 pair-wise comparisons. (C), Pie charts showing the fractions of the DEGs that are unique in one  
888 pair-wise comparison group or shared by 2-4 groups of pair-wise comparisons. Numbers in the  
889 center of each chart represents the total number of DEGs in each indicated pair-wise  
890 comparison group. (D), Bubble plots showing selected gene ontology terms (GO terms)  
891 enrichment comparing LLPCs groups (highlighted in yellow) and day 5 control groups bulk PCs  
892 (highlighted in red) based on previously identified DEGs in (A). Color scale bar showing the  
893 percentage of DEGs upregulated per GO term in each pair-wise comparison group (red,  $> 50\%$   
894 upregulated DEGs; blue,  $< 50\%$  upregulated DEGs). Circle size represents the significance of  
895 the enrichment based on the  $-\log_{10}(p\text{-value})$ . (E and F), Heatmap of all DEGs encoding surface  
896 proteins (E) or transcription factors (F) between LLPC groups and bulk PC groups in both the



897 spleen (left) and the bone marrow (right), which are further separated by gene clusters identified  
898 in (A).

899 Figure 7. LLPC receptors have reduced BCR diversity but enriched in public clones.

900 (A), Stacked bar plots showing isotype gene usage (the fraction of isotypes in total mapped  
901 complete clones per group) in LLPCs and bulk PCs at day 5 and 90 post tamoxifen treatment  
902 across tissue types (spleen and bone marrow) and mouse ages (young and middle-aged). Line  
903 thickness represents the statistical significance based on p-value thresholds. Line color  
904 represents the comparisons of color-coded isotypes between groups. (B), BCR repertoire  
905 diversity of LLPCs and bulk PCs at indicated timepoints across tissue types (spleen and bone  
906 marrow) and mouse ages (young and middle-aged), estimated by chao 1 richness index for the  
907 abundance of unique clones in a repertoire per group. Each symbol represents one mouse, and  
908 pooled bulk PC samples comparing pooled LLPC samples at day 90 post tamoxifen treatment  
909 were shown on the right in black. (C), The percentage of clones shared by indicated PC subsets  
910 within the same mouse (intra-mouse). X axis format (A::B) reflects samples A & B used for  
911 comparison. (D), Violin plots comparing the distribution of somatic mutation frequencies per  
912 specific V region (across all clones) in YFP<sup>-</sup> bulk PCs and YFP<sup>+</sup> LLPCs at indicated timepoints  
913 in young and middle-aged mice. Each symbol represents one clone, and multiple samples were  
914 pooled from each group. (E), Average mutation frequencies of all clones in (D) for each PC  
915 subset in indicated tissues in young and middle-aged mice. Each symbol represents one mouse.  
916 (F), The percentage of clones shared by all samples, day 5 samples, middle-aged mice samples,  
917 and young samples. Each symbol represents one sample (e.g., BM YFP<sup>+</sup> sample, BM YFP<sup>-</sup>  
918 sample, etc.). (G), Frequency of top 100 most abundant public clones in all PC samples  
919 compared to that in LLPC samples. Clones showing no preference for LLPC samples over total  
920 samples are distributed on the diagonal line in the plot. Each symbol represents a clone. (H),  
921 Pie charts showing the fraction of total clones or top 100 most abundant public clones in LLPCs

922 compared to other PCs. (I), Stacked bar plots showing the distribution of sample types (in  
923 tissues and age of mice) per most frequent public clone in LLPCs. Number on the right of each  
924 stacked bar represents the number of mice. \*,  $P < 0.05$ ; \*\*,  $P < 0.01$ ; \*\*\*\*,  $P < 0.0001$ ; exact p-  
925 values for non-significance by unpaired Student's t test.

926

927

928

## 929 **References**

- 930 Aaron, T.S., and Fooksman, D.R. (2022). Dynamic organization of the bone marrow plasma cell niche.  
931 *FEBS J* 289, 4228-4239.
- 932 Akhmetzyanova, I., Aaron, T., Galbo, P., Tikhonova, A., Dolgalev, I., Tanaka, M., Aifantis, I., Zheng, D.,  
933 Zang, X., and Fooksman, D. (2021). Tissue-resident macrophages promote early dissemination of  
934 multiple myeloma via IL-6 and TNFalpha. *Blood Adv* 5, 3592-3608.
- 935 Allen, C.D., Ansel, K.M., Low, C., Lesley, R., Tamamura, H., Fujii, N., and Cyster, J.G. (2004). Germinal  
936 center dark and light zone organization is mediated by CXCR4 and CXCR5. *Nature immunology* 5, 943-  
937 952.
- 938 Baumgarth, N. (2011). The double life of a B-1 cell: self-reactivity selects for protective effector functions.  
939 *Nat Rev Immunol* 11, 34-46.
- 940 Baumgarth, N. (2016). B-1 Cell Heterogeneity and the Regulation of Natural and Antigen-Induced IgM  
941 Production. *Front Immunol* 7, 324.
- 942 Benet, Z., Jing, Z., and Fooksman, D.R. (2021). Plasma cell dynamics in the bone marrow niche. *Cell*  
943 *reports* 34, 108733.
- 944 Biajoux, V., Natt, J., Freitas, C., Alouche, N., Sacquin, A., Hemon, P., Gaudin, F., Fazilleau, N., Espeli, M.,  
945 and Balabanian, K. (2016). Efficient Plasma Cell Differentiation and Trafficking Require Cxcr4  
946 Desensitization. *Cell reports* 17, 193-205.
- 947 Blanc, P., Moro-Sibilot, L., Barthly, L., Jagot, F., This, S., de Bernard, S., Buffat, L., Dussurgey, S., Colisson,  
948 R., Hobeika, E., *et al.* (2016). Mature IgM-expressing plasma cells sense antigen and develop  
949 competence for cytokine production upon antigenic challenge. *Nat Commun* 7, 13600.
- 950 Bohannon, C., Powers, R., Satyabhaman, L., Cui, A., Tipton, C., Michaeli, M., Skountzou, I., Mittler, R.S.,  
951 Kleinstein, S.H., Mehr, R., *et al.* (2016). Long-lived antigen-induced IgM plasma cells demonstrate  
952 somatic mutations and contribute to long-term protection. *Nat Commun* 7, 11826.
- 953 Bolotin, D.A., Poslavsky, S., Mitrophanov, I., Shugay, M., Mamedov, I.Z., Putintseva, E.V., and Chudakov,  
954 D.M. (2015). MiXCR: software for comprehensive adaptive immunity profiling. *Nature methods* 12, 380-  
955 381.
- 956 Bortnick, A., and Allman, D. (2013). What is and what should always have been: long-lived plasma cells  
957 induced by T cell-independent antigens. *J Immunol* 190, 5913-5918.

958 Bortnick, A., Chernova, I., Quinn, W.J., 3rd, Mugnier, M., Cancro, M.P., and Allman, D. (2012). Long-lived  
959 bone marrow plasma cells are induced early in response to T cell-independent or T cell-dependent  
960 antigens. *J Immunol* *188*, 5389-5396.

961 Chevrier, S., Genton, C., Kallies, A., Karnowski, A., Otten, L.A., Malissen, B., Malissen, M., Botto, M.,  
962 Corcoran, L.M., Nutt, S.L., and Acha-Orbea, H. (2009). CD93 is required for maintenance of antibody  
963 secretion and persistence of plasma cells in the bone marrow niche. *Proc Natl Acad Sci U S A* *106*, 3895-  
964 3900.

965 Conway, J.R., Lex, A., and Gehlenborg, N. (2017). UpSetR: an R package for the visualization of  
966 intersecting sets and their properties. *Bioinformatics* *33*, 2938-2940.

967 Cornelis, R., Hahne, S., Taddeo, A., Petkau, G., Malko, D., Durek, P., Thiem, M., Heiberger, L., Peter, L.,  
968 Mohr, E., *et al.* (2020). Stromal Cell-Contact Dependent PI3K and APRIL Induced NF-kappaB Signaling  
969 Prevent Mitochondrial- and ER Stress Induced Death of Memory Plasma Cells. *Cell Rep* *32*, 107982.

970 Di Pietro, A., Polmear, J., Cooper, L., Damelang, T., Hussain, T., Hailes, L., O'Donnell, K., Udupa, V., Mi, T.,  
971 Preston, S., *et al.* (2022). Targeting BMI-1 in B cells restores effective humoral immune responses and  
972 controls chronic viral infection. *Nature immunology* *23*, 86-98.

973 Dobin, A., Davis, C.A., Schlesinger, F., Drenkow, J., Zaleski, C., Jha, S., Batut, P., Chaisson, M., and  
974 Gingeras, T.R. (2013). STAR: ultrafast universal RNA-seq aligner. *Bioinformatics* *29*, 15-21.

975 Fedele, G., Trentini, F., Schiavoni, I., Abrignani, S., Antonelli, G., Baldo, V., Baldovin, T., Bandera, A.,  
976 Bonura, F., Clerici, P., *et al.* (2022). Evaluation of humoral and cellular response to four vaccines against  
977 COVID-19 in different age groups: A longitudinal study. *Frontiers in immunology* *13*, 1021396.

978 Fooksman, D.R., Schwickert, T.A., Victora, G.D., Dustin, M.L., Nussenzweig, M.C., and Skokos, D. (2010).  
979 Development and migration of plasma cells in the mouse lymph node. *Immunity* *33*, 118-127.

980 Fowell, D.J., and Kim, M. (2021). The spatio-temporal control of effector T cell migration. *Nat Rev*  
981 *Immunol* *21*, 582-596.

982 Frasca, D., and Blomberg, B.B. (2020). Aging induces B cell defects and decreased antibody responses to  
983 influenza infection and vaccination. *Immun Ageing* *17*, 37.

984 Gires, O., Pan, M., Schinke, H., Canis, M., and Baeuerle, P.A. (2020). Expression and function of epithelial  
985 cell adhesion molecule EpCAM: where are we after 40 years? *Cancer Metastasis Rev* *39*, 969-987.

986 Good-Jacobson, K.L., O'Donnell, K., Belz, G.T., Nutt, S.L., and Tarlinton, D.M. (2015). c-Myb is required  
987 for plasma cell migration to bone marrow after immunization or infection. *The Journal of experimental*  
988 *medicine* *212*, 1001-1009.

989 Greenbaum, D., Colangelo, C., Williams, K., and Gerstein, M. (2003). Comparing protein abundance and  
990 mRNA expression levels on a genomic scale. *Genome Biol* *4*, 117.

991 Hauser, A.E., Debes, G.F., Arce, S., Cassese, G., Hamann, A., Radbruch, A., and Manz, R.A. (2002).  
992 Chemotactic responsiveness toward ligands for CXCR3 and CXCR4 is regulated on plasma blasts during  
993 the time course of a memory immune response. *J Immunol* *169*, 1277-1282.

994 Higgins, B.W., Shuparski, A.G., Miller, K.B., Robinson, A.M., McHeyzer-Williams, L.J., and McHeyzer-  
995 Williams, M.G. (2022). Isotype-specific plasma cells express divergent transcriptional programs. *Proc*  
996 *Natl Acad Sci U S A* *119*, e2121260119.

997 Jash, A., Zhou, Y.W., Gerardo, D.K., Ripperger, T.J., Parikh, B.A., Piersma, S., Jamwal, D.R., Kiela, P.R.,  
998 Boon, A.C.M., Yokoyama, W.M., *et al.* (2019). ZBTB32 restrains antibody responses to murine  
999 cytomegalovirus infections, but not other repetitive challenges. *Sci Rep* *9*, 15257.

1000 Joyner, C.J., Ley, A.M., Nguyen, D.C., Ali, M., Corrado, A., Tipton, C., Scharer, C.D., Mi, T., Woodruff, M.C.,  
1001 Hom, J., *et al.* (2022). Generation of human long-lived plasma cells by developmentally regulated  
1002 epigenetic imprinting. *Life Sci Alliance* *5*.

1003 Kallies, A., Hasbold, J., Tarlinton, D.M., Dietrich, W., Corcoran, L.M., Hodgkin, P.D., and Nutt, S.L. (2004).  
1004 Plasma cell ontogeny defined by quantitative changes in blimp-1 expression. *The Journal of*  
1005 *experimental medicine* *200*, 967-977.

1006 Koike, T., Fujii, K., Kometani, K., Butler, N.S., Funakoshi, K., Yari, S., Kikuta, J., Ishii, M., Kurosaki, T., and  
1007 Ise, W. (2023). Progressive differentiation toward the long-lived plasma cell compartment in the bone  
1008 marrow. *The Journal of experimental medicine* 220.  
1009 Lam, W.Y., Jash, A., Yao, C.H., D'Souza, L., Wong, R., Nunley, R.M., Meares, G.P., Patti, G.J., and  
1010 Bhattacharya, D. (2018). Metabolic and Transcriptional Modules Independently Diversify Plasma Cell  
1011 Lifespan and Function. *Cell reports* 24, 2479-2492 e2476.  
1012 Lammermann, T., and Kastenmuller, W. (2019). Concepts of GPCR-controlled navigation in the immune  
1013 system. *Immunological reviews* 289, 205-231.  
1014 Lemke, A., Kraft, M., Roth, K., Riedel, R., Lammerding, D., and Hauser, A.E. (2016). Long-lived plasma  
1015 cells are generated in mucosal immune responses and contribute to the bone marrow plasma cell pool  
1016 in mice. *Mucosal Immunol* 9, 83-97.  
1017 Lex, A., Gehlenborg, N., Strobel, H., Vuilleumot, R., and Pfister, H. (2014). UpSet: Visualization of  
1018 Intersecting Sets. *IEEE Trans Vis Comput Graph* 20, 1983-1992.  
1019 Li, B., and Dewey, C.N. (2011). RSEM: accurate transcript quantification from RNA-Seq data with or  
1020 without a reference genome. *BMC Bioinformatics* 12, 323.  
1021 Lino, A.C., Dang, V.D., Lampropoulou, V., Welle, A., Joedicke, J., Pohar, J., Simon, Q., Thalmensi, J.,  
1022 Baures, A., Fluhler, V., *et al.* (2018). LAG-3 Inhibitory Receptor Expression Identifies Immunosuppressive  
1023 Natural Regulatory Plasma Cells. *Immunity* 49, 120-133 e129.  
1024 Liu, X., Yao, J., Zhao, Y., Wang, J., and Qi, H. (2022). Heterogeneous plasma cells and long-lived subsets in  
1025 response to immunization, autoantigen and microbiota. *Nature immunology* 23, 1564-1576.  
1026 Madisen, L., Zwingman, T.A., Sunkin, S.M., Oh, S.W., Zariwala, H.A., Gu, H., Ng, L.L., Palmiter, R.D.,  
1027 Hawrylycz, M.J., Jones, A.R., *et al.* (2010). A robust and high-throughput Cre reporting and  
1028 characterization system for the whole mouse brain. *Nat Neurosci* 13, 133-140.  
1029 Manz, R.A., Thiel, A., and Radbruch, A. (1997). Lifetime of plasma cells in the bone marrow. *Nature* 388,  
1030 133-134.  
1031 Mathis, D., and Benoist, C. (2009). Aire. *Annu Rev Immunol* 27, 287-312.  
1032 Mayer, C.T., Gazumyan, A., Kara, E.E., Gitlin, A.D., Golijanin, J., Viant, C., Pai, J., Oliveira, T.Y., Wang, Q.,  
1033 Escolano, A., *et al.* (2017). The microanatomic segregation of selection by apoptosis in the germinal  
1034 center. *Science* 358.  
1035 McCarron, M.J., Park, P.W., and Fooksman, D.R. (2017). CD138 mediates selection of mature plasma  
1036 cells by regulating their survival. *Blood* 129, 2749-2759.  
1037 Mokhtari, Z., Mech, F., Zehentmeier, S., Hauser, A.E., and Figge, M.T. (2015). Quantitative image analysis  
1038 of cell colocalization in murine bone marrow. *Cytometry A* 87, 503-512.  
1039 Nie, Y., Waite, J., Brewer, F., Sunshine, M.J., Littman, D.R., and Zou, Y.R. (2004). The role of CXCR4 in  
1040 maintaining peripheral B cell compartments and humoral immunity. *The Journal of experimental*  
1041 *medicine* 200, 1145-1156.  
1042 Nunez, S., Moore, C., Gao, B., Rogers, K., Hidalgo, Y., Del Nido, P.J., Restaino, S., Naka, Y., Bhagat, G.,  
1043 Madsen, J.C., *et al.* (2016). The human thymus perivascular space is a functional niche for viral-specific  
1044 plasma cells. *Sci Immunol* 1.  
1045 Palacios-Pedrero, M.A., Osterhaus, A., Becker, T., Elbahesh, H., Rimmelzwaan, G.F., and Saletti, G. (2021).  
1046 Aging and Options to Halt Declining Immunity to Virus Infections. *Frontiers in immunology* 12, 681449.  
1047 Phan, T.G., Paus, D., Chan, T.D., Turner, M.L., Nutt, S.L., Basten, A., and Brink, R. (2006). High affinity  
1048 germinal center B cells are actively selected into the plasma cell compartment. *The Journal of*  
1049 *experimental medicine* 203, 2419-2424.  
1050 Pioli, P.D., Casero, D., Montecino-Rodriguez, E., Morrison, S.L., and Dorshkind, K. (2019). Plasma Cells  
1051 Are Obligate Effectors of Enhanced Myelopoiesis in Aging Bone Marrow. *Immunity* 51, 351-366 e356.

- 1052 Racine, R., McLaughlin, M., Jones, D.D., Wittmer, S.T., MacNamara, K.C., Woodland, D.L., and Winslow,  
1053 G.M. (2011). IgM production by bone marrow plasmablasts contributes to long-term protection against  
1054 intracellular bacterial infection. *J Immunol* *186*, 1011-1021.
- 1055 Robinson, M.J., Dowling, M.R., Pitt, C., O'Donnell, K., Webster, R.H., Hill, D.L., Ding, Z., Dvorscek, A.R.,  
1056 Brodie, E.J., Hodgkin, P.D., *et al.* (2022). Long-lived plasma cells accumulate in the bone marrow at a  
1057 constant rate from early in an immune response. *Sci Immunol* *7*, eabm8389.
- 1058 Robinson, M.J., Webster, R.H., and Tarlinton, D.M. (2020). How intrinsic and extrinsic regulators of  
1059 plasma cell survival might intersect for durable humoral immunity. *Immunological reviews* *296*, 87-103.
- 1060 Schaum, N., Lehallier, B., Hahn, O., Palovics, R., Hosseinzadeh, S., Lee, S.E., Sit, R., Lee, D.P., Losada, P.M.,  
1061 Zardeneta, M.E., *et al.* (2020). Ageing hallmarks exhibit organ-specific temporal signatures. *Nature* *583*,  
1062 596-602.
- 1063 Scotton, C.J., Wilson, J.L., Scott, K., Stamp, G., Wilbanks, G.D., Fricker, S., Bridger, G., and Balkwill, F.R.  
1064 (2002). Multiple actions of the chemokine CXCL12 on epithelial tumor cells in human ovarian cancer.  
1065 *Cancer research* *62*, 5930-5938.
- 1066 Shi, W., Liao, Y., Willis, S.N., Taubenheim, N., Inouye, M., Tarlinton, D.M., Smyth, G.K., Hodgkin, P.D.,  
1067 Nutt, S.L., and Corcoran, L.M. (2015). Transcriptional profiling of mouse B cell terminal differentiation  
1068 defines a signature for antibody-secreting plasma cells. *Nature immunology* *16*, 663-673.
- 1069 Slifka, M.K., Antia, R., Whitmire, J.K., and Ahmed, R. (1998). Humoral immunity due to long-lived plasma  
1070 cells. *Immunity* *8*, 363-372.
- 1071 Srinivas, S., Watanabe, T., Lin, C.S., William, C.M., Tanabe, Y., Jessell, T.M., and Costantini, F. (2001). Cre  
1072 reporter strains produced by targeted insertion of EYFP and ECFP into the ROSA26 locus. *BMC Dev Biol* *1*,  
1073 4.
- 1074 Sze, D.M., Toellner, K.M., Garcia de Vinuesa, C., Taylor, D.R., and MacLennan, I.C. (2000). Intrinsic  
1075 constraint on plasmablast growth and extrinsic limits of plasma cell survival. *The Journal of experimental*  
1076 *medicine* *192*, 813-821.
- 1077 Takahashi, Y., Dutta, P.R., Cerasoli, D.M., and Kelsoe, G. (1998). In situ studies of the primary immune  
1078 response to (4-hydroxy-3-nitrophenyl)acetyl. V. Affinity maturation develops in two stages of clonal  
1079 selection. *The Journal of experimental medicine* *187*, 885-895.
- 1080 Utley, A., Chavel, C., Lightman, S., Holling, G.A., Cooper, J., Peng, P., Liu, W., Barwick, B.G., Gavile, C.M.,  
1081 Maguire, O., *et al.* (2020). CD28 Regulates Metabolic Fitness for Long-Lived Plasma Cell Survival. *Cell*  
1082 *reports* *31*, 107815.
- 1083 Vergani, S., Muleta, K.G., Da Silva, C., Doyle, A., Kristiansen, T.A., Sodini, S., Krausse, N., Montano, G.,  
1084 Kotarsky, K., Nakawesi, J., *et al.* (2022). A self-sustaining layer of early-life-origin B cells drives steady-  
1085 state IgA responses in the adult gut. *Immunity* *55*, 1829-1842 e1826.
- 1086 Wagner, A., and Weinberger, B. (2020). Vaccines to Prevent Infectious Diseases in the Older Population:  
1087 Immunological Challenges and Future Perspectives. *Frontiers in immunology* *11*, 717.
- 1088 Weisel, F.J., Zuccarino-Catania, G.V., Chikina, M., and Shlomchik, M.J. (2016). A Temporal Switch in the  
1089 Germinal Center Determines Differential Output of Memory B and Plasma Cells. *Immunity* *44*, 116-130.
- 1090 Wilmore, J.R., Gaudette, B.T., Gomez Atria, D., Hashemi, T., Jones, D.D., Gardner, C.A., Cole, S.D., Mistic,  
1091 A.M., Beiting, D.P., and Allman, D. (2018). Commensal Microbes Induce Serum IgA Responses that  
1092 Protect against Polymicrobial Sepsis. *Cell Host Microbe* *23*, 302-311 e303.
- 1093 Winkelmann, R., Sandrock, L., Porstner, M., Roth, E., Mathews, M., Hobeika, E., Reth, M., Kahn, M.L.,  
1094 Schuh, W., and Jack, H.M. (2011). B cell homeostasis and plasma cell homing controlled by Kruppel-like  
1095 factor 2. *Proc Natl Acad Sci U S A* *108*, 710-715.
- 1096 Xu, A.Q., Barbosa, R.R., and Calado, D.P. (2020). Genetic timestamping of plasma cells in vivo reveals  
1097 tissue-specific homeostatic population turnover. *eLife* *9*.
- 1098 Zehentmeier, S., and Pereira, J.P. (2019). Cell circuits and niches controlling B cell development.  
1099 *Immunological reviews* *289*, 142-157.

1100

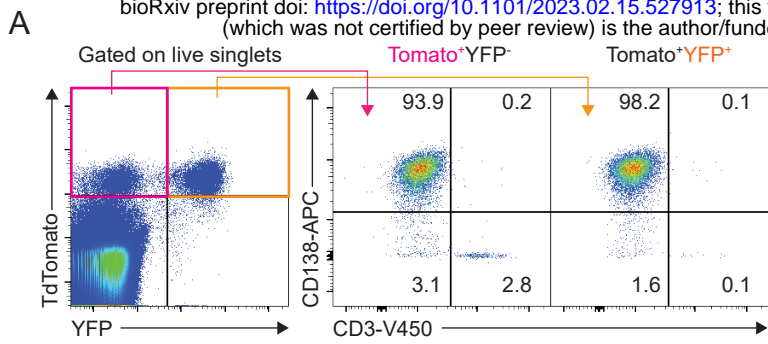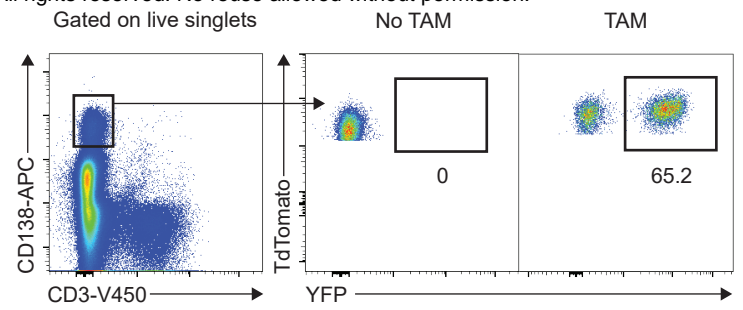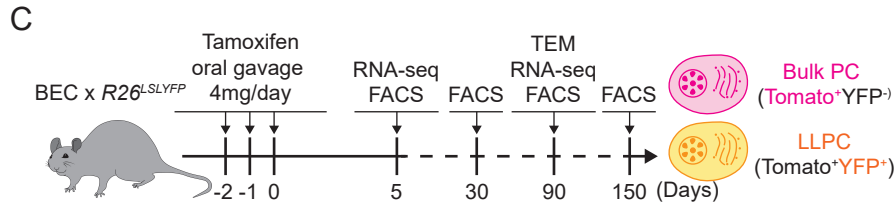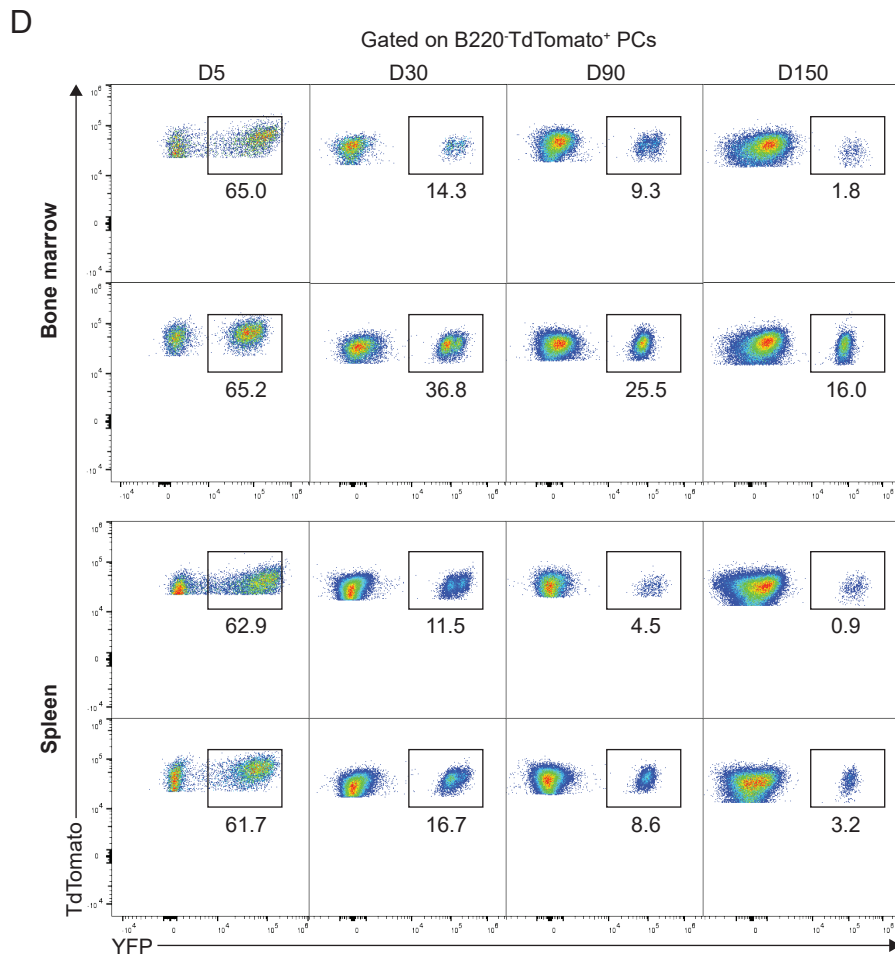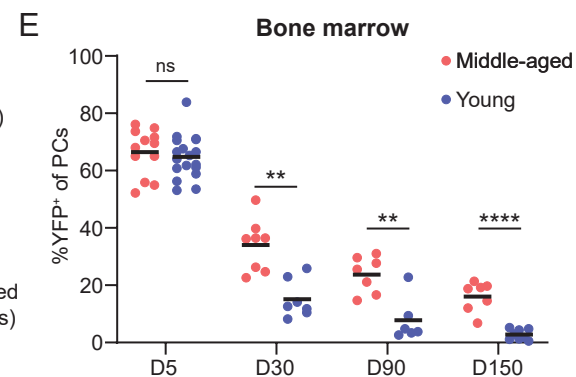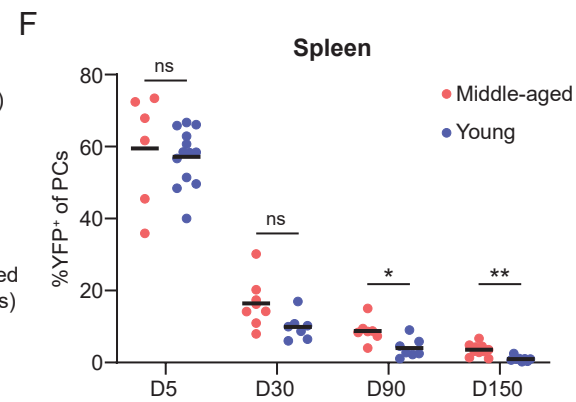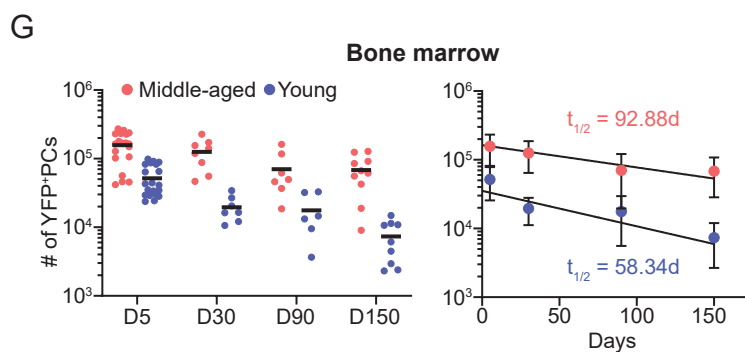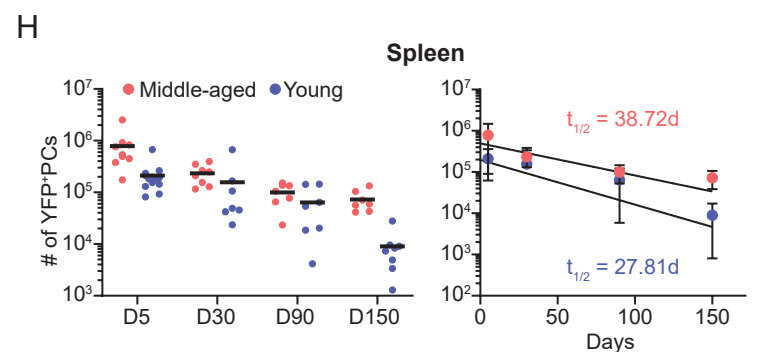

A

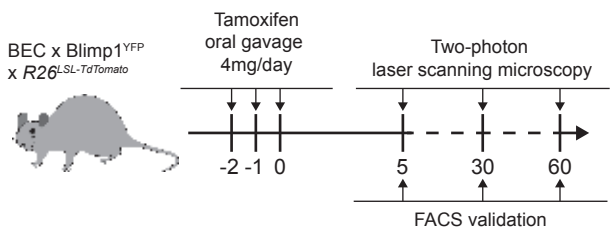

B

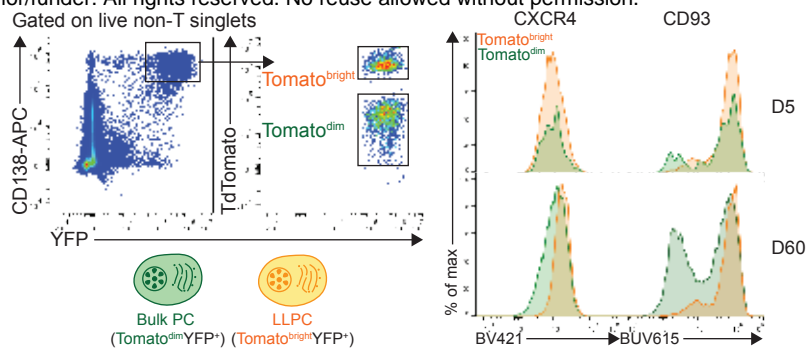

C

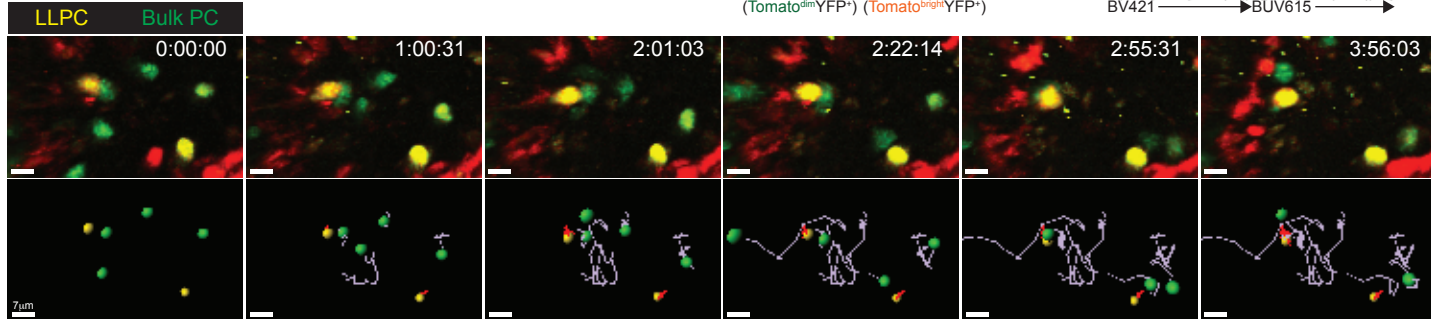

D

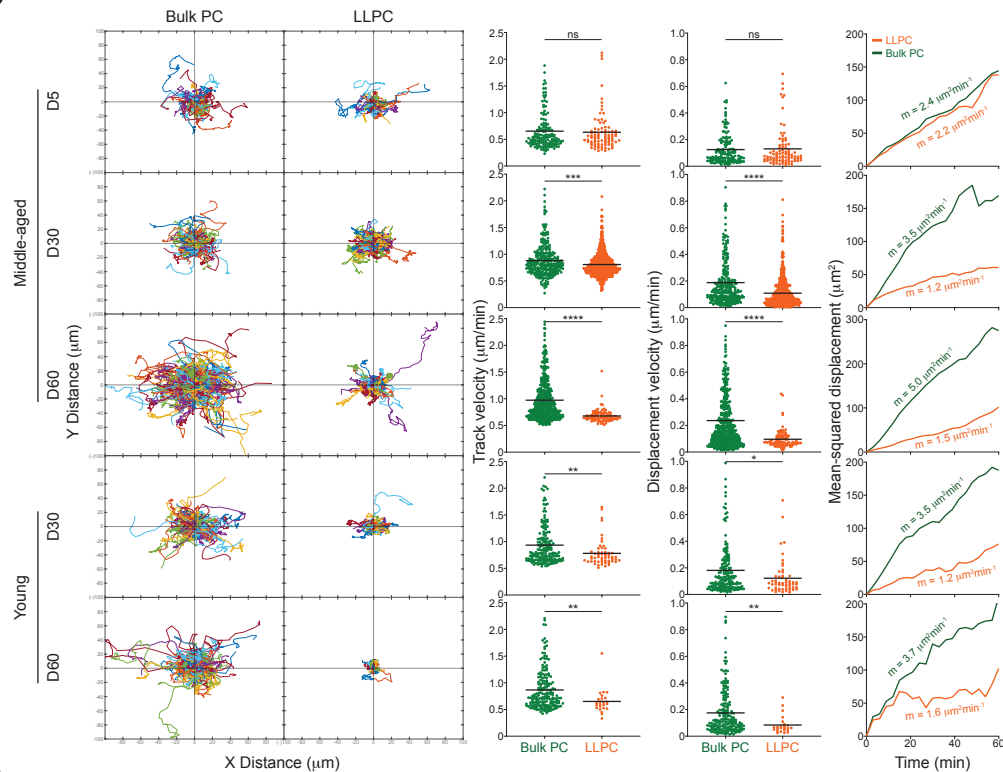

E

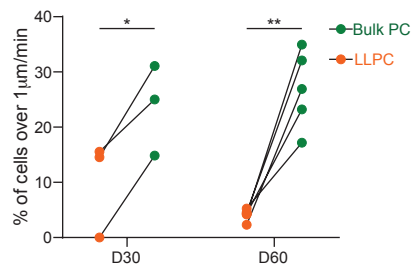

F

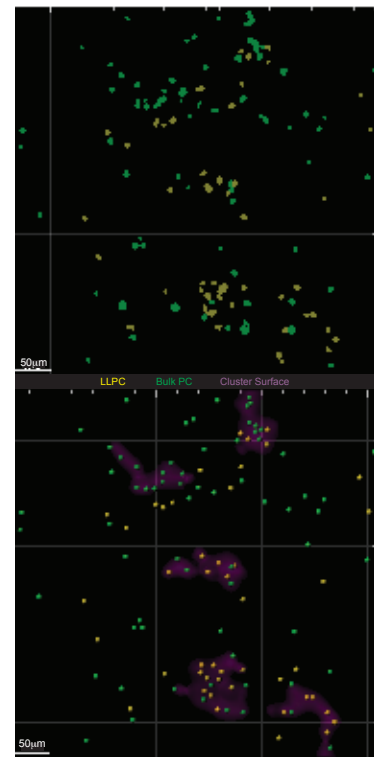

G

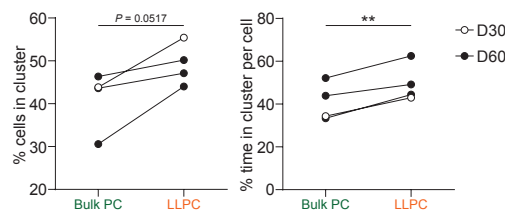

H

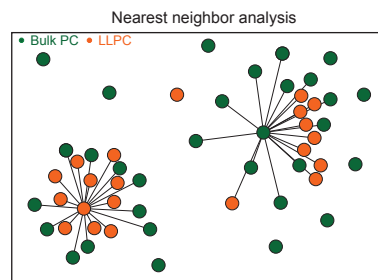

I

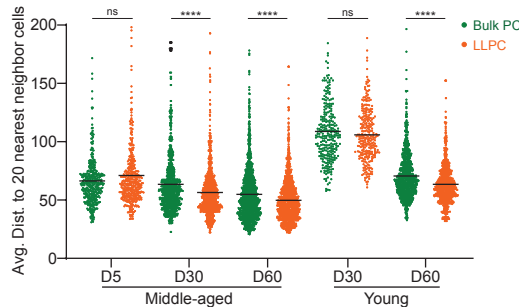



A

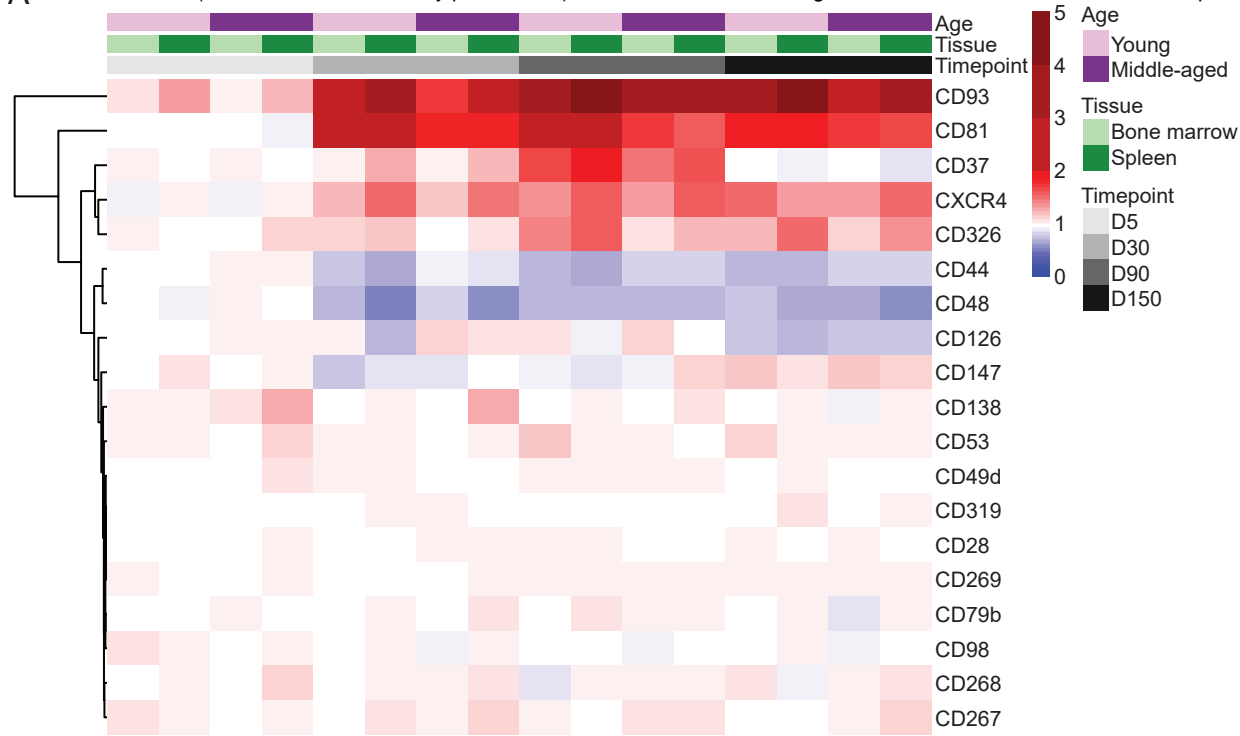

B

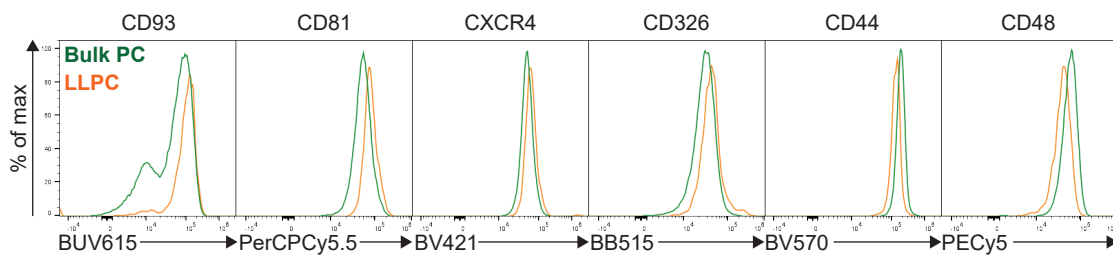

C

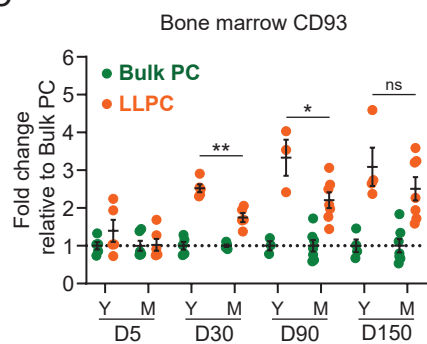

D

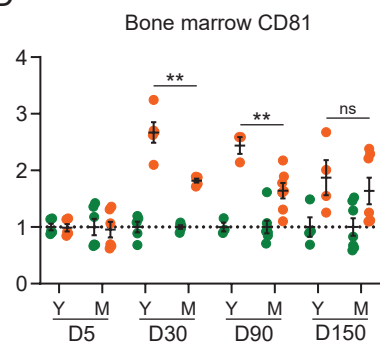

E

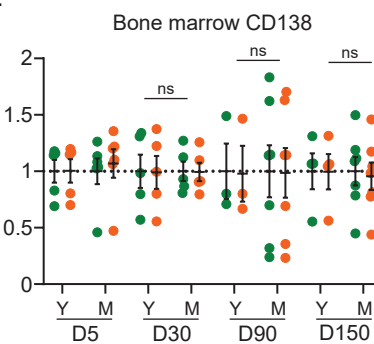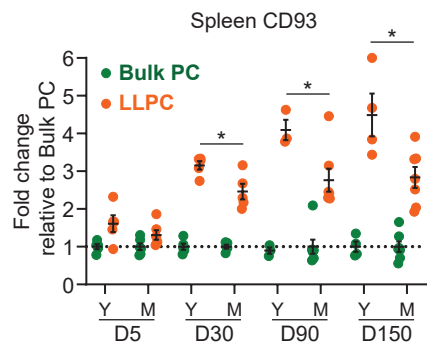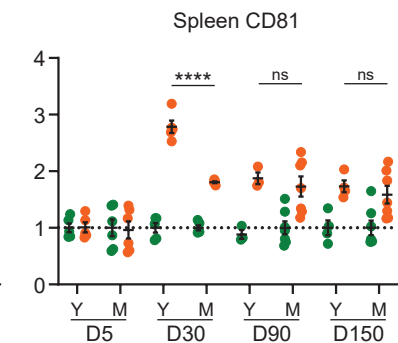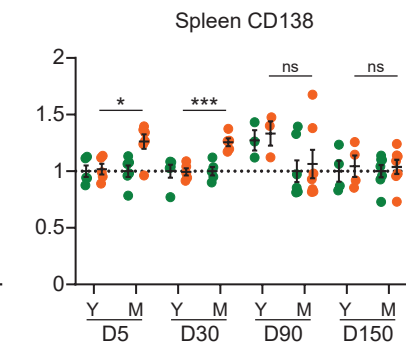

A

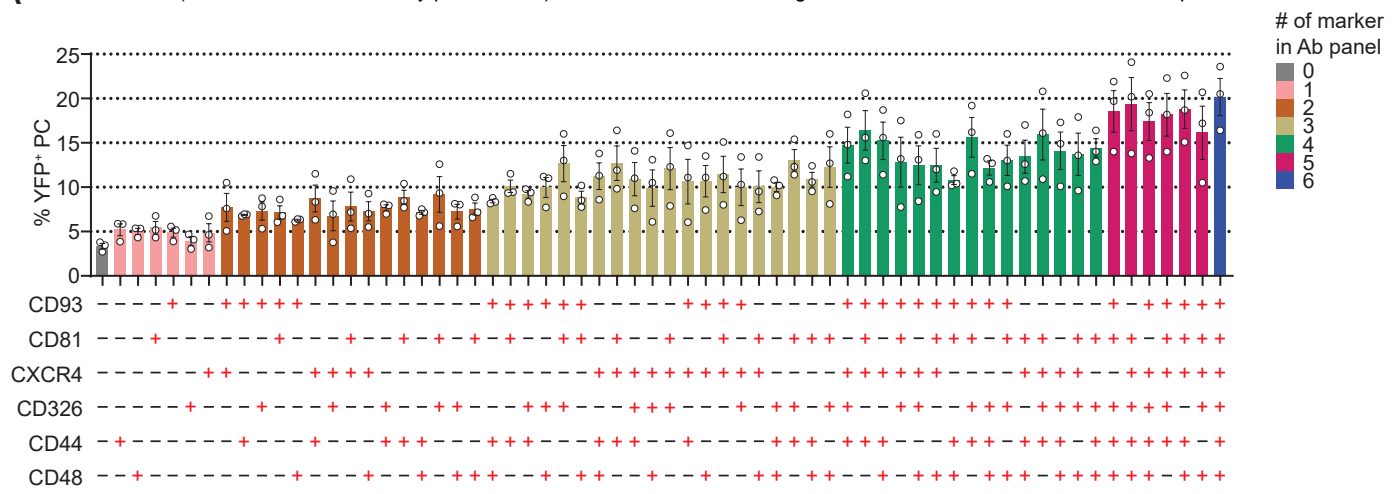

B

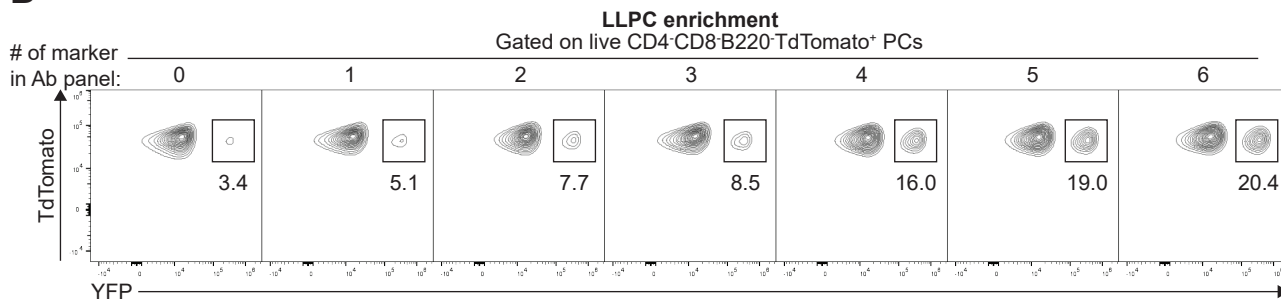

C

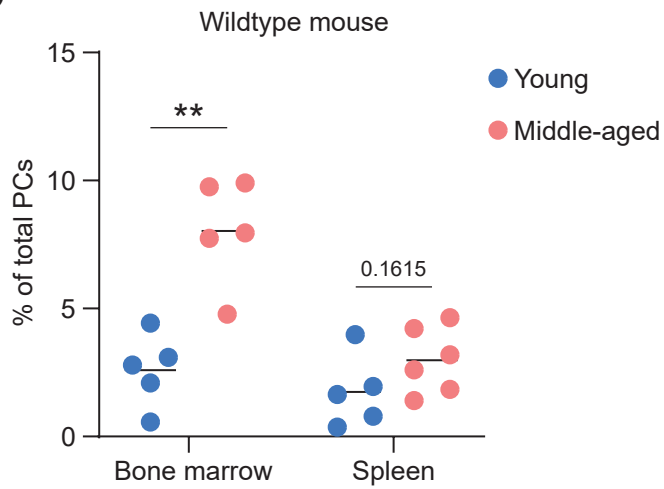

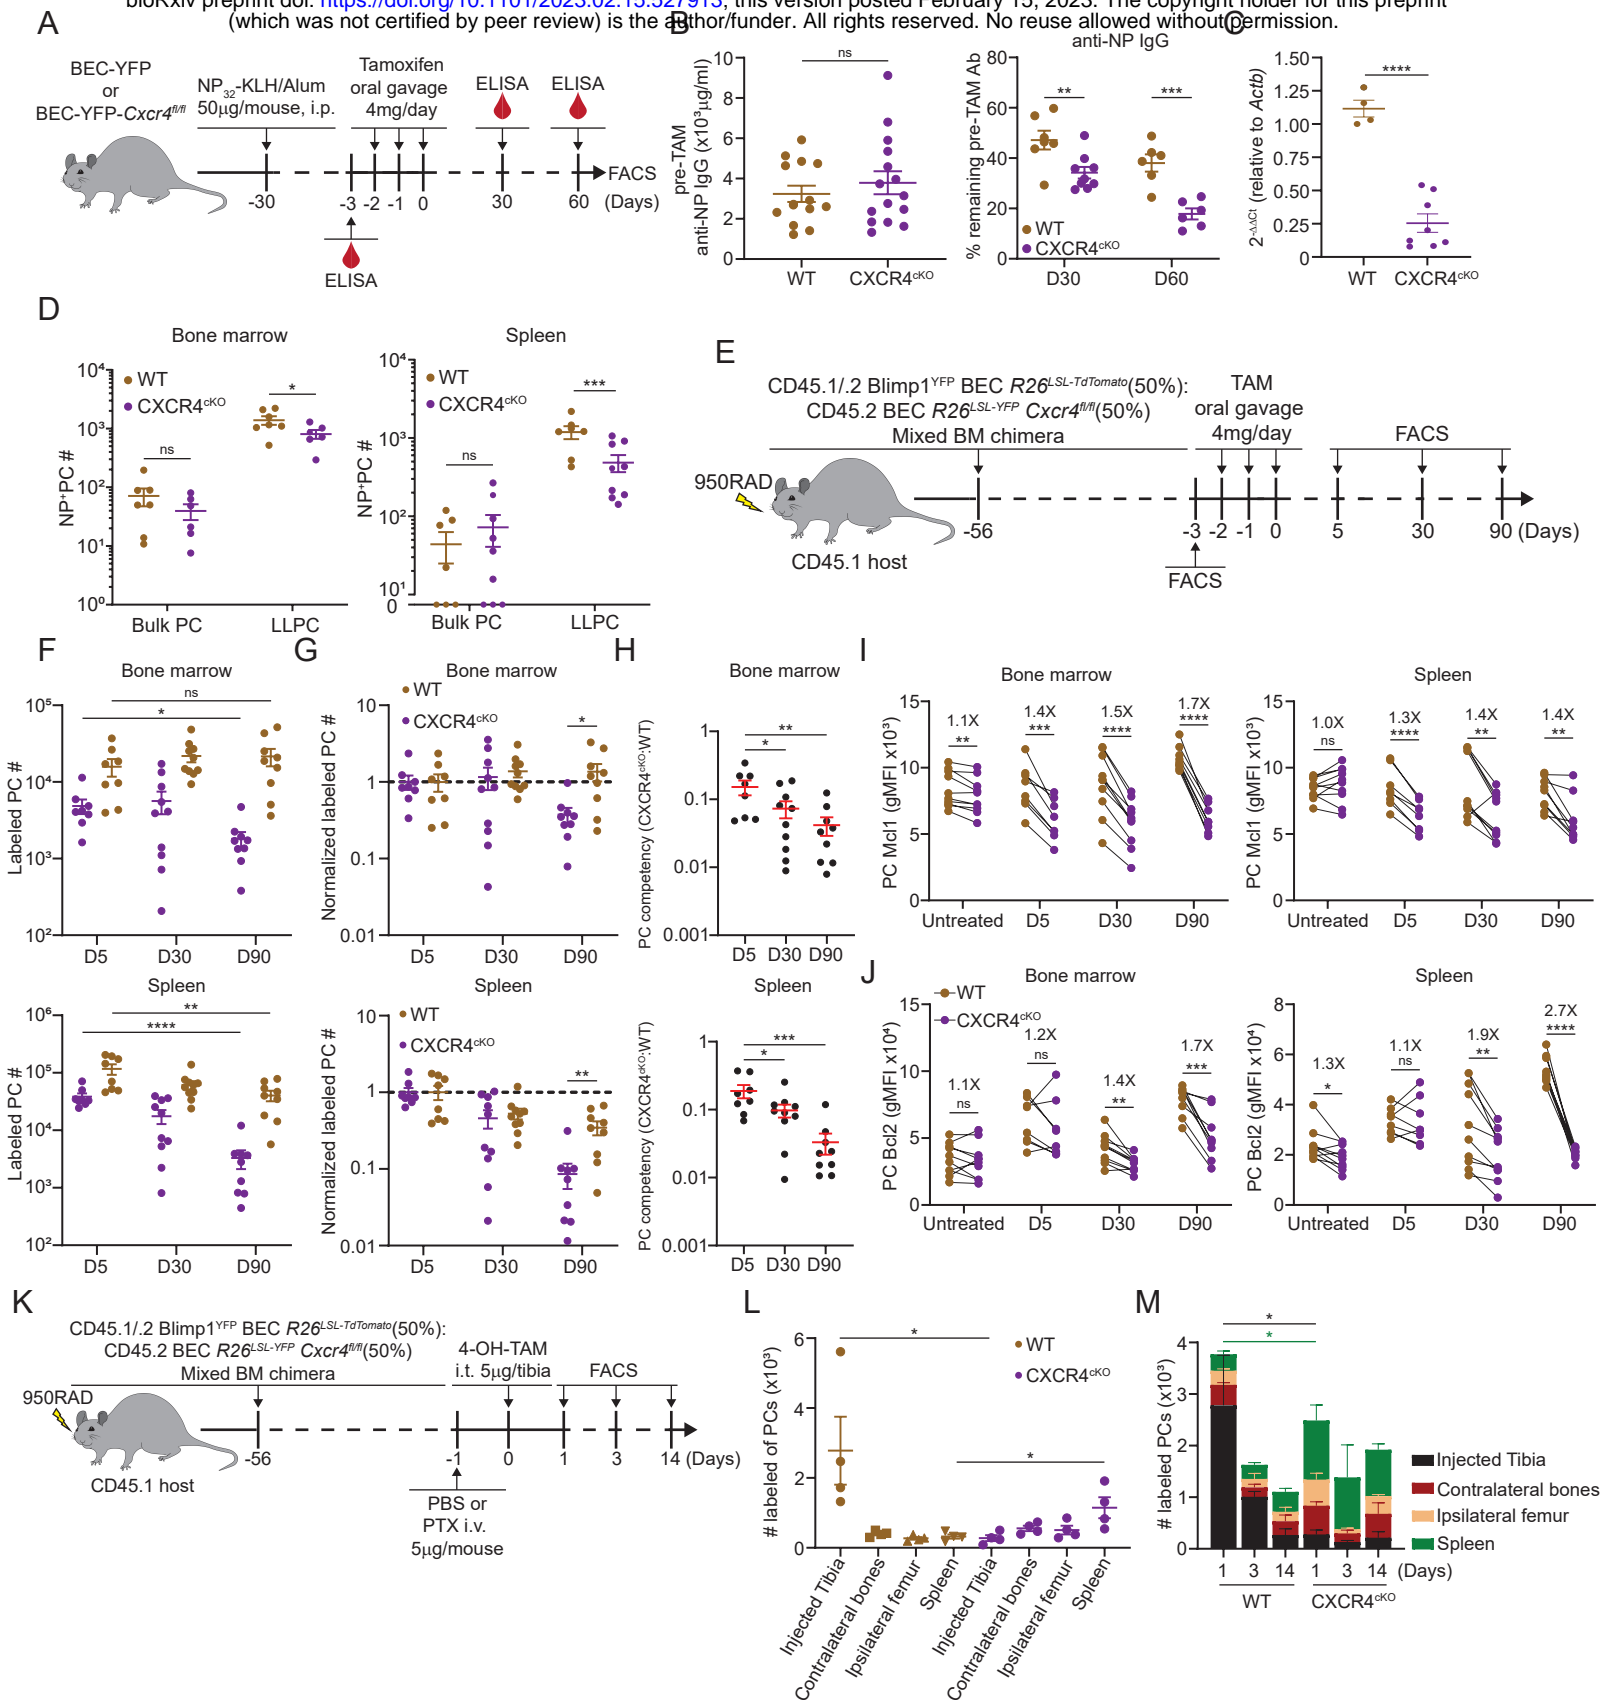

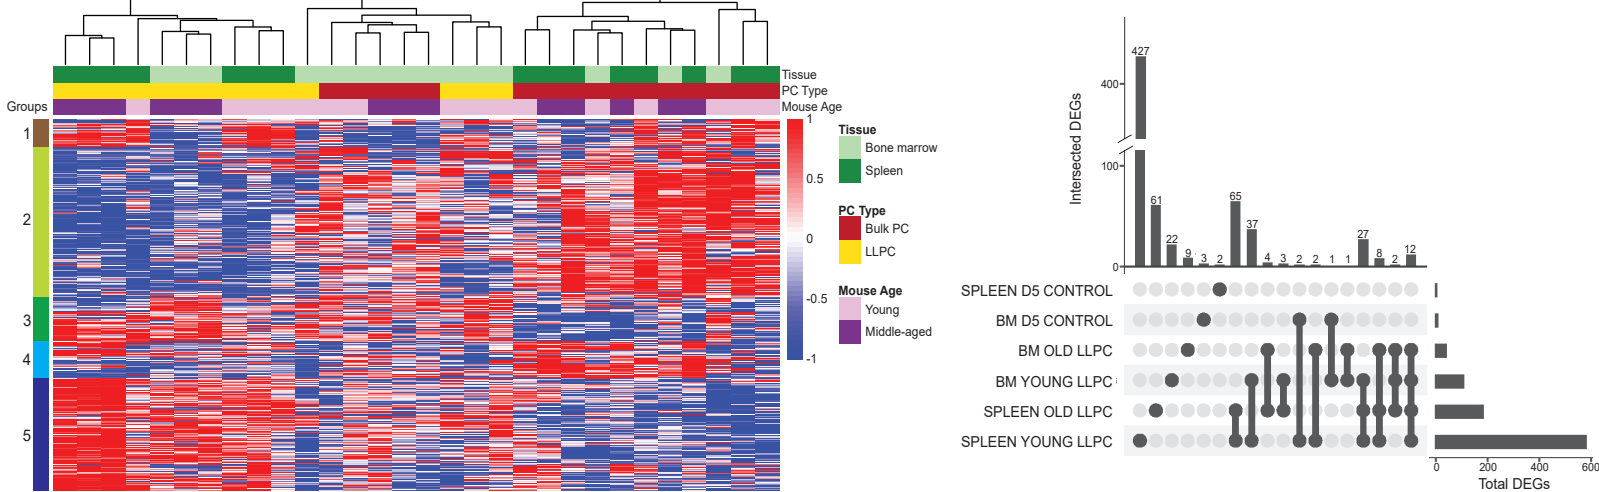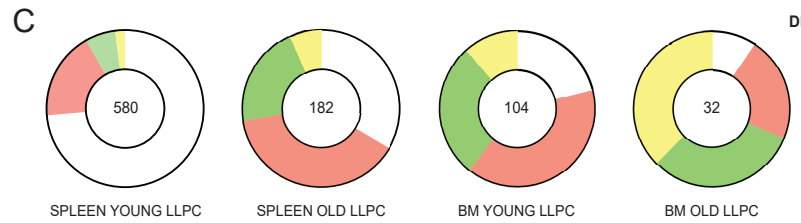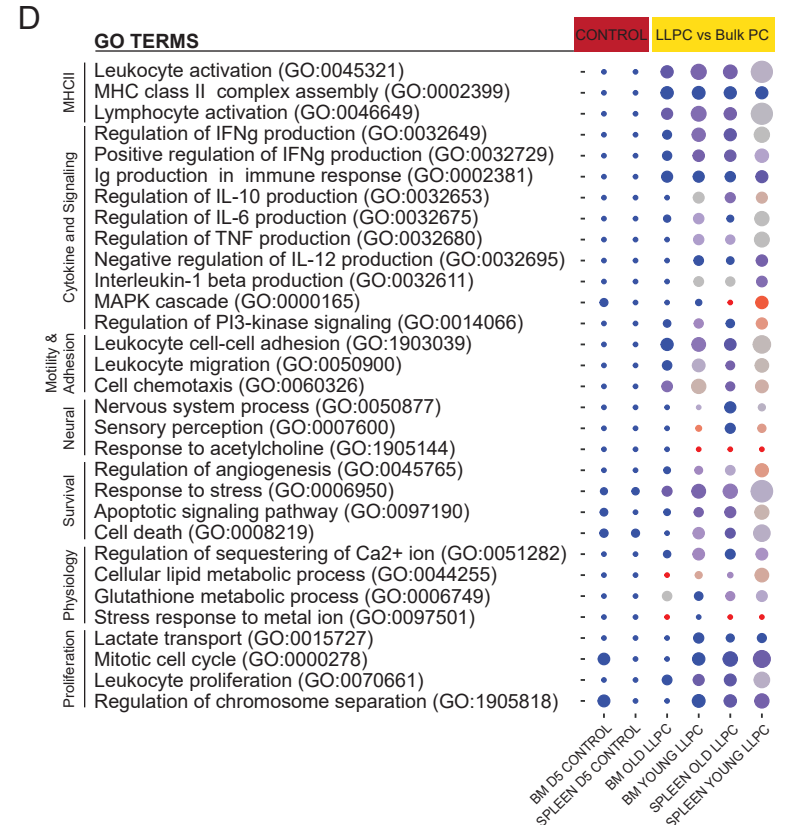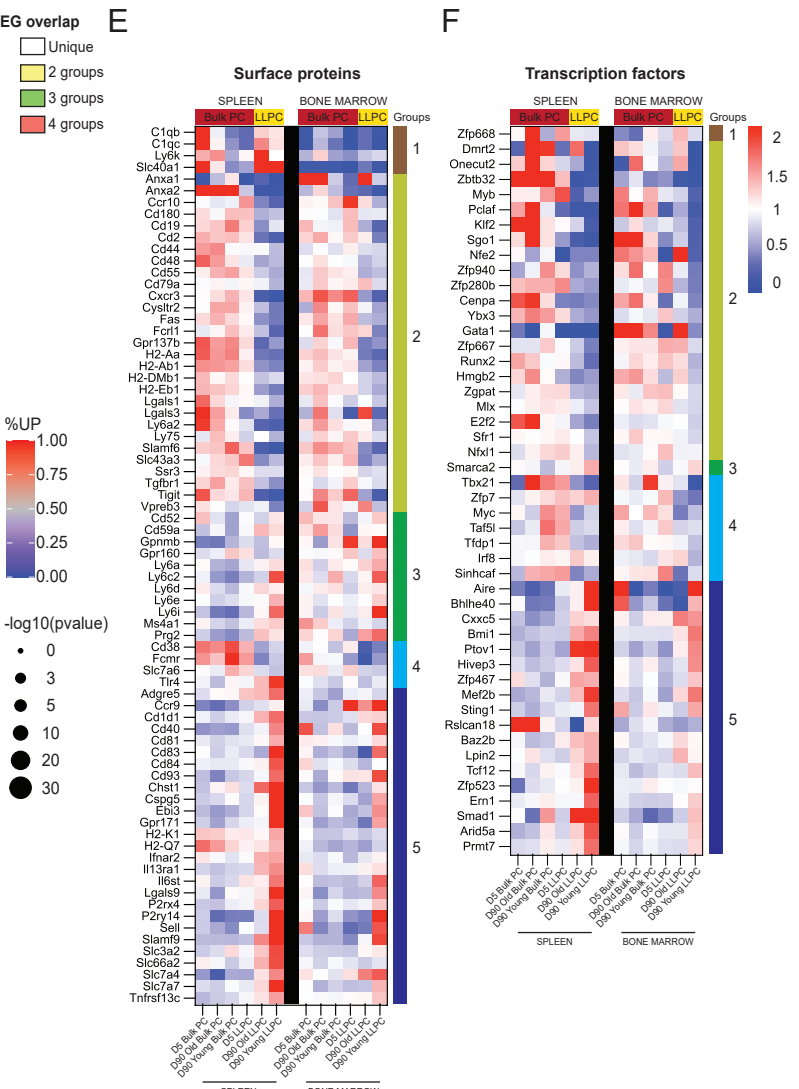

**A**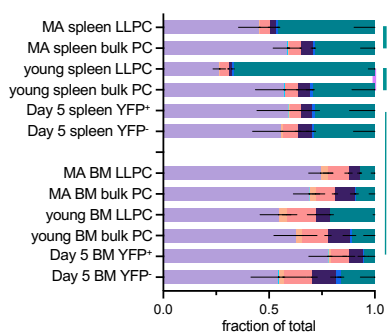**B**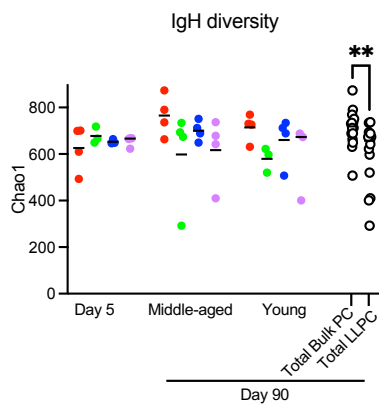**C**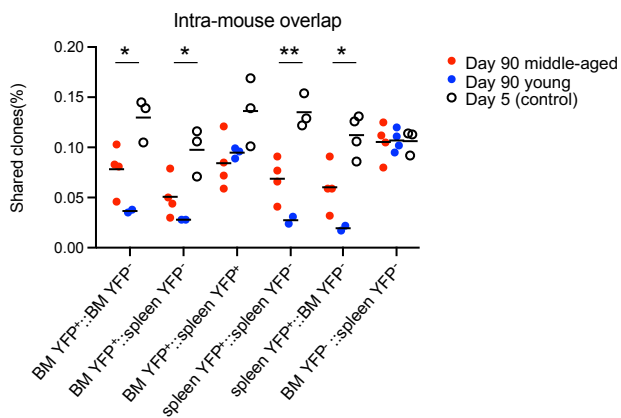**D**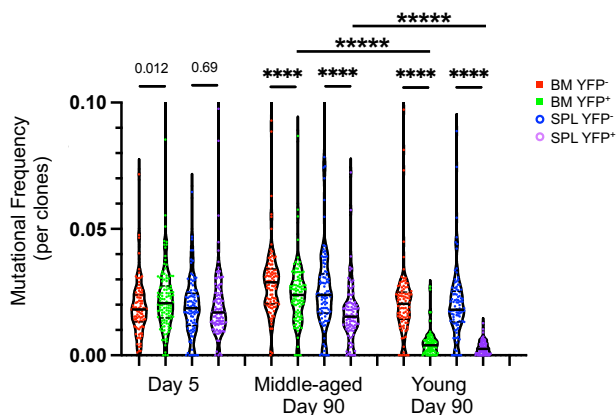**E**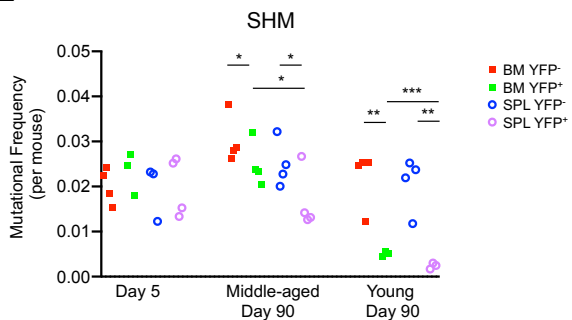**F**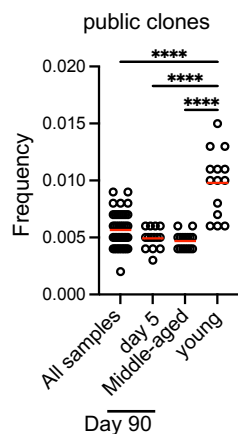**G**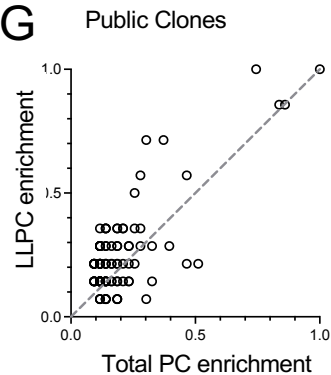**H**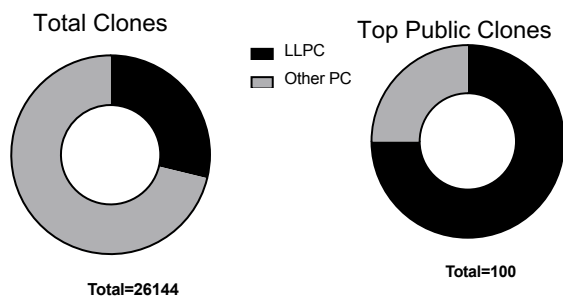**I**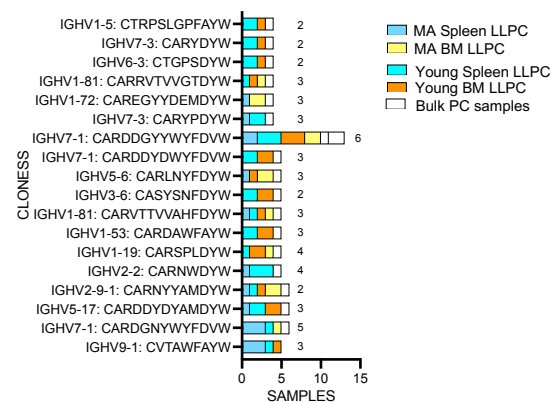

Source: https://www.biorxiv.org/content/10.1101/2023.02.15.527913v1.full.pdf
